1 **Genome-wide analyses of XRN1-sensitive targets in osteosarcoma cells identifies disease-relevant**  
2 **transcripts containing G-rich motifs.**

3 Amy L. Pashler, Benjamin P. Towler<sup>‡</sup>, Christopher I. Jones, Tom Burgess, and Sarah F. Newbury<sup>1\*</sup>

4

5 Brighton and Sussex Medical School, University of Sussex, Brighton, BN1 9PS, UK

6

7 <sup>\*</sup>Corresponding author: Prof Sarah Newbury, Medical Research Building, Brighton and Sussex

8 Medical School, University of Sussex, Falmer, Brighton BN1 9PS, UK.

9 Tel: +44(0)1273 877874

10 s.newbury@bsms.ac.uk

11

12 <sup>‡</sup>Co-corresponding author: Dr Ben Towler, Medical Research Building, Brighton and Sussex Medical

13 School, University of Sussex, Falmer, Brighton BN1 9PS, UK.

14 Tel: +44(0)1273 877876

15 b.towler2@bsms.ac.uk

16

17 **Running title: XRN1-sensitive targets in osteosarcoma cells**

18

19 **Key words:** XRN1, RNA-seq, Ewing sarcoma, lncRNAs, RNA degradation, G-rich

20

21

22

23

24

25

26

27

28

29

30

31

32

33

34 **ABSTRACT**

35 XRN1 is a highly conserved exoribonuclease which degrades uncapped RNAs in a 5'-3' direction.  
36 Degradation of RNAs by XRN1 is important in many cellular and developmental processes and is  
37 relevant to human disease. Studies in *D. melanogaster* demonstrate that XRN1 can target specific  
38 RNAs, which have important consequences for developmental pathways. Osteosarcoma is a  
39 malignancy of the bone and accounts for 2% of all paediatric cancers worldwide. 5 year survival of  
40 patients has remained static since the 1970s and therefore furthering our molecular understanding  
41 of this disease is crucial. Previous work has shown a downregulation of XRN1 in osteosarcoma cells,  
42 however the transcripts regulated by XRN1 which might promote osteosarcoma remain elusive.  
43 Here, we confirm reduced levels of XRN1 in osteosarcoma cell lines and patient samples and identify  
44 XRN1-sensitive transcripts in human osteosarcoma cells. Using RNA-seq in XRN1-knockdown SAOS-2  
45 cells, we show that 1178 genes are differentially regulated. Using a novel bioinformatic approach,  
46 we demonstrate that 134 transcripts show characteristics of direct post-transcriptional regulation by  
47 XRN1. Long non-coding RNAs (lncRNAs) are enriched in this group suggesting that XRN1 normally  
48 plays an important role in controlling lncRNA expression in these cells. Among potential lncRNAs  
49 targeted by XRN1 is *HOTAIR*, which is known to be upregulated in osteosarcoma and contribute to  
50 disease progression. We have also identified G-rich and GU motifs in post-transcriptionally regulated  
51 transcripts which appear to sensitise them to XRN1 degradation. Our results therefore provide  
52 significant insights into the specificity of XRN1 in human cells which is relevant to disease.

53 **INTRODUCTION**

54 Spatial and temporal control of gene expression is critical to maintain cellular homeostasis. A crucial  
55 part of this regulatory network is the post-transcriptional control of RNA turnover in the cytoplasm.  
56 Deficiencies in RNA degradation can result in excesses of particular RNAs, which has implications for  
57 organism development, cell proliferation and a variety of human diseases including inflammation  
58 and viral infection (Astuti et al. 2012, Moon et al. 2015, Towler et al. 2015, Pashler et al. 2016,

59 Towler et al. 2016, Towler and Newbury 2018, Towler et al. 2019). A major pathway operating within  
60 this network to provide post-transcriptional control of RNA expression is the 5'-3' cytoplasmic RNA  
61 decay machinery. At the core of this pathway is the highly conserved 5'-3' exoribonuclease XRN1.  
62 XRN1, the only cytoplasmic 5'-3' exoribonuclease, functions as a complex with the decapping  
63 proteins DCP1/DCP2 (Braun et al. 2012) to remove the protective 5' methylguanosine cap, resulting  
64 in an RNA with a 5' phosphate which is susceptible to decay by XRN1.

65 Recent work suggests a model where XRN1-mediated decay is critical to maintain a complex  
66 regulatory feedback loop to control RNA Polymerase II (RNA pol II) activity (Abernathy et al. 2015,  
67 Gilbertson et al. 2018). Additional work has suggested that XRN1 itself is able to function as a  
68 transcriptional regulator in yeast cells (Blasco-Moreno et al. 2019). Modulation of XRN1 activity has  
69 been demonstrated to result in the cellular redistribution of a number of RNA binding proteins,  
70 which in turn affect RNA pol II activity (Gilbertson et al. 2018). XRN1 has also been demonstrated to  
71 be involved in co-translational decay (Tuck et al. 2020). Work in yeast has shown that XRN1 is able to  
72 directly interact with the ribosome, where the mRNA is directly channelled from the ribosomal  
73 decoding site into the active site of XRN1 (Tesina et al. 2019). Additionally, XRN1 has been shown to  
74 facilitate the clearance of transcripts on which the ribosome is stalled in mouse embryonic stem cells  
75 (Tuck et al. 2020). During nonsense mediated decay in mammalian cells, XRN1 rapidly removes the  
76 3' portion of the transcript after SMG-6-catalysed cleavage (Boehm et al. 2016). Therefore, XRN1 is  
77 plays a key role in many cellular pathways to regulate RNA levels.

78 Previous work in model organisms, such as *D. melanogaster*, *C. elegans* and *A. thaliana*, has shown  
79 null mutations/depletion of XRN1 results in specific developmental defects and/or lethality, strongly  
80 suggesting that XRN1 can target specific RNAs important in cellular or physiological processes. In *D.*  
81 *melanogaster*, null mutations result in defects during embryonic dorsal closure, small imaginal discs  
82 and lethality at the early pupal stage (Grima et al. 2008, Jones et al. 2012, Jones et al. 2013, Waldron  
83 et al. 2015, Jones et al. 2016). A key target in the larval stage is *dilp8*, encoding a secreted insulin-like

84 peptide, which is known to co-ordinate developmental timing (Colombani et al. 2012, Jones et al.  
85 2016). In *C. elegans*, knockdown of *xrn-1* results in defects in embryonic ventral enclosure and  
86 subsequent lethality, although the targets are unknown (Newbury and Woollard 2004). Whilst this  
87 work highlights the crucial developmental role of XRN1, the specific, physiologically relevant XRN1  
88 targets in human cells remain elusive. The only well characterised role of XRN1 in human cells is  
89 during the host response to viral infection where its activity is inhibited, resulting in the stabilisation  
90 of short-lived RNAs such as FOS and TUT1 (Moon et al. 2012, Chapman et al. 2014, Moon et al.  
91 2015).

92 Here we set out to identify and categorise XRN1-sensitive transcripts which are directly and  
93 indirectly sensitive to XRN1 activity in human cancer cells. Using modern techniques, we confirm  
94 previous findings by Zhang and colleagues (Zhang et al. 2002) to show that *XRN1* transcripts are  
95 reduced in levels in both osteosarcoma cell lines and patient samples, and extend these findings to  
96 two Ewing sarcoma cell lines. We identify a specific subset of transcripts that show sensitivity to  
97 XRN1 expression in osteosarcoma SAOS-2 cells and develop a method to assess the nature of their  
98 sensitivity. Using this method we demonstrate that transcripts that are directly and indirectly  
99 regulated by XRN1 are involved in specific cellular processes and display features which may confer  
100 their XRN1 sensitivity.

## 101 **RESULTS**

### 102 ***XRN1* is misexpressed in a subset of cancers of the mesenchymal lineage**

103 *XRN1* is an enzyme expressed ubiquitously with a critical role in regulating cytoplasmic RNA  
104 degradation. Semi-quantitative RT-PCR has been used previously to show that *XRN1* has reduced  
105 expression in human osteosarcoma cell lines and patient samples compared to foetal osteoblast  
106 (HOb) cells (Zhang et al. 2002). We confirmed these findings using modern quantitative PCR (qRT-  
107 PCR) on a range of human osteosarcoma cells lines and observed reductions in *XRN1* transcript levels  
108 in HOS and U-2 OS cells compared to HOb control cells. HOb cells were used as controls because

109 they are primary foetal osteoblast cells and are not cancerous. No difference was observed in the  
110 SAOS-2 cell line, showing *XRN1* downregulation was not ubiquitous across osteosarcoma cell lines  
111 (Fig 1A). Interestingly, the HOS cell line, which expresses the lowest levels of *XRN1*, is also the most  
112 proliferative, whilst SAOS-2 cells, which do not show reduced *XRN1* expression proliferate more  
113 slowly (Sup Fig 1A). In contrast to *XRN1*, levels of other ribonucleases, *XRN2*, *DIS3*, *DIS3L1* and *DIS3L2*  
114 were not reduced, demonstrating that downregulation is specific to *XRN1* and not a general  
115 reduction in RNA stability mediators (Sup Fig 1B). Indeed, our results show an increase in the levels  
116 of all these other ribonucleases in HOS cells, suggesting a compensatory mechanism to maintain  
117 normal RNA levels. We then assessed the levels of *XRN1* pre-mRNA to test if transcription of *XRN1*  
118 was inhibited in these cells. Interestingly, we did not observe *pre-XRN1* downregulation in HOS or U-  
119 2 OS cells, suggesting the observed effects are a result of differential regulation at the post-  
120 transcriptional level (Fig 1B).

121 To determine whether reduced levels of *XRN1* might have clinical importance in osteosarcoma we  
122 measured *XRN1* mRNA expression in 9 patient samples. Strikingly, all 9 samples showed reduced  
123 *XRN1* mRNA expression compared to HOb cells (Fig 1C). Western blotting confirmed the reduction in  
124 *XRN1* protein expression in U-2 OS cells, although a reduction in protein was not observed in HOS  
125 cells. Consistent with our qRT-PCR data, *XRN1* protein expression was unaffected in SAOS-2 cells (Fig  
126 1D). To test if our observations were specific to osteosarcoma progression, we next assessed *XRN1*  
127 expression in the pathologically related bone sarcoma, Ewing Sarcoma. A decrease in both *XRN1*  
128 mRNA and protein was observed in two Ewing sarcoma cell lines, RD-ES and SK-ES-1, showing that  
129 our previous observations are not specific to osteosarcoma and suggesting *XRN1* may have broader  
130 clinical importance (Fig 1E/F). Taken together these data demonstrate a need for further mechanistic  
131 understanding of the specific role played by *XRN1* in these cells which could have clinical relevance.

132 **Phenotypic behaviour of SAOS-2 cells is not affected by *XRN1* knockdown**

133 Given the clear reduction of *XRN1* expression in the majority of osteosarcoma and Ewing sarcoma  
134 cells we set out to identify cellular processes specifically regulated by XRN1 within these cells. To  
135 achieve this, we performed a variety of phenotypic assays to determine the effect of XRN1 down  
136 regulation on cancer cell behaviour. For these experiments we used SAOS-2 cells as they showed  
137 wild-type levels of XRN1 expression compared to the HOb control. We hypothesised that depletion  
138 of XRN1 in SAOS-2 cells may induce a phenocopy of the HOS or U-2 OS cell lines which show an  
139 increased growth rate (Sup Fig 1A). Using siRNA we successfully reduced XRN1 expression to 20% of  
140 the levels observed in the scrambled siRNA controls within 24 hours. XRN1 protein levels remained  
141 depleted until at least 144hrs post transfection (Fig 2A and Sup Fig 2).

142 Using this model, we assessed proliferation and cell viability using BrdU staining and WST-1 assays,  
143 respectively. Although XRN1 expression was reduced by 81.8% we did not observe phenotypic  
144 changes when compared to the scrambled siRNA control (Fig 2B/C). Similarly, a Caspase-Glo 3/7  
145 assay showed no strong change in the levels of apoptosis following XRN1 depletion (Fig 2D). In  
146 addition to viability and proliferation, cell migration is another crucial hallmark of cancer progression  
147 (Hanahan and Weinberg 2011). To assess if XRN1 depletion affects the rate of cell migration we used  
148 a transwell assay. However, we observed no changes in cell migration between XRN1-depleted and  
149 scrambled siRNA treated control cells over a 30-hour period (Fig 2E).

150 Finally, given that XRN1 has recently been shown to have strong roles in co-translational regulation  
151 in human and yeast cells (Tesina et al. 2019, Tuck et al. 2020) and translation factors are XRN4  
152 targets in plant cells (Nagarajan et al. 2019) we hypothesised that the loss of XRN1 may affect  
153 translation rates. To test this we used SuNSET labelling to assess the rates of translation in XRN1-  
154 deficient cells. SuNSET labelling involves incubating cells with the tRNA analogue puromycin and  
155 subsequent blotting with a monoclonal  $\alpha$ -puromycin antibody to detect and measure nascent  
156 translation. As puromycin is known to inhibit translation, careful optimisation of the concentration  
157 and time of incubation for each specific cell line was essential. We used 2.5 $\mu$ g/ml for 60 mins in

158 SAOS-2 cells as we observed sufficient labelling whilst minimising the chances of saturation, in  
159 contrast to 10µg/ml which demonstrated reduced labelling after 60-90 mins, suggesting an  
160 inhibitory role on translation (Sup Fig 3). Although successful knockdown was achieved in each  
161 sample, we did not observe any difference in the rate of translation between XRN1 knockdown and  
162 scrambled siRNA control cells (Fig 2F). In summary, depletion of XRN1 in SAOS-2 cells does not  
163 appear to affect cell growth, viability, migration, or translation. It is possible, however, that XRN1  
164 affects a phenotype we did not specifically test. Another possible reason is that immortalisation of  
165 SAOS-2 cells has been achieved through a mechanism not dependent upon XRN1, and that  
166 subsequent reduction in XRN1 level does not have an additive effect on this mechanism.  
167 Alternatively, there could be redundant or compensatory mechanisms within human cells following  
168 the loss of XRN1, although this seems unlikely based on observations in other organisms.

#### 169 **RNA-sequencing reveals XRN1-sensitive transcripts in SAOS-2 cells.**

170 The results presented above show that although *XRN1* is post-transcriptionally depleted in human  
171 osteo- and Ewing- sarcoma cells and patient samples, its depletion appears to have no effect on the  
172 cell behaviours tested within SAOS-2 cells. We therefore adopted a molecular approach in order to  
173 identify transcripts that show specific sensitivity to XRN1 expression in SAOS-2 cells. By identifying  
174 these transcripts, we aimed to gain insights into the role of XRN1 in osteosarcoma cells.

175 We performed RNA-sequencing on SAOS-2 cells treated with either siRNAs to *XRN1* or a scrambled  
176 control, with 6 biological replicates for each condition; each XRN1 knockdown sample had a  
177 minimum *XRN1* depletion of 75% (Sup Fig 4A). For our initial analysis we removed adapters and  
178 quality trimmed raw RNA-sequencing files using Sickle and Scythe. Next, we used HISat2 to map  
179 reads to the human genome (Ensembl release GRCh38.93). To account for potential expression  
180 changes due to conducting the knockdowns over consecutive weeks (1 Scrambled and 1 knockdown  
181 sample per week), we assessed gene expression using paired analysis. featureCounts was then used  
182 to count the number of reads mapping to each gene and paired differential expression analysis was

183 subsequently performed using edgeR. Hierarchical clustering confirmed the paired nature of the  
184 samples, justifying our bioinformatic approach (Sup Fig 4B). Our analyses identified 1178  
185 differentially expressed genes (defined as fold change >2 and FDR <0.05), of which 777 genes were  
186 upregulated and 401 genes were downregulated (Fig 3A). A greater number of upregulated  
187 transcripts is in line with the nature of XRN1 as an exoribonuclease with targets expected to increase  
188 in expression in the absence of XRN1.

189 While the initial analysis revealed a specific set of XRN1-sensitive transcripts, it did not explicitly  
190 identify those transcripts that are directly regulated by XRN1. For example, the 777 upregulated  
191 transcripts stabilised following XRN1 depletion, may represent direct effects (where transcripts are  
192 actively degraded by XRN1), or alternatively they could be transcriptionally upregulated as indirect  
193 consequences of loss of XRN1. We therefore re-purposed our analysis pipeline to allow genome  
194 wide assessment of transcriptional (indirect) and post-transcriptional (direct) effects of XRN1  
195 depletion. To achieve this, we created a GTF annotation file containing the co-ordinates of every  
196 intron in the human genome. We then used featureCounts to count the number of exon (or intron)  
197 mapping reads in each XRN1 knockdown and control sample to find transcripts that increased post-  
198 transcriptionally. This was determined by identifying those with transcripts showing increases in  
199 exon-mapping reads but not in intron mapping-reads, indicating increased levels of mature mRNAs.  
200 Alternatively, those transcripts with increases in both exon and intron mapping reads would show  
201 increases in pre-mRNA, indicating increased transcription. The resulting count files were processed  
202 in a paired manner using edgeR and the same criteria were used to determine differential expression  
203 (fold change of >2 and an FDR of <0.05).

204 Using this approach, we saw high correlation between exon and gene related fold changes (Sup Fig  
205 5,  $r^2=0.91$ ) with 722 transcripts passing the threshold in both samples (Fig 3B-E). When we included  
206 the intron level data, we observed a clear differentiation between post-transcriptional and  
207 transcriptional expression changes (Fig 3B/C). For example, transcriptionally upregulated transcripts



208 (orange data points in Fig 3B/C) show increased expression at both the exon (Fig 3B) and intron (Fig  
209 3C) levels. In contrast, 134 transcripts show the characteristics of post-transcriptional, direct  
210 regulation by XRN1 where increased expression is observed at the exon level but not the intron level  
211 (where the red data points in Fig 3C are within the grey, unchanged, region). We performed the  
212 same analyses on the downregulated transcripts and again observed examples of transcriptional  
213 (blue data points) and post-transcriptional (purple data points) changes in expression. We  
214 hypothesise that both transcriptional and post-transcriptional downregulation represent indirect  
215 effects due to XRN1 depletion. The transcripts that show post-transcriptional downregulation are  
216 likely to be themselves regulated by transcripts that are directly regulated by XRN1 such as miRNAs  
217 or those encoding RNA binding proteins. These analyses provide the first genome-wide  
218 differentiation between direct and indirect changes in gene expression following XRN1 depletion in  
219 human cells, summarised in Tables 1-4 and Supplemental File 1.

#### 220 **XRN1-sensitive transcripts are involved in distinct biological processes**

221 We used Gene Ontology (GO) analysis to identify specific biological processes affected following  
222 XRN1 depletion. Interestingly, GO analysis of all misregulated transcripts revealed an enrichment of  
223 genes involved in cell migration, a crucial hallmark of cancer progression (Fig 4A). However, we did  
224 not observe increased migration in our transwell assay, although this could be due to the nature of  
225 the knockdown experiments (discussed further below). Interestingly we also observe potential roles  
226 of XRN1 in epithelial and epidermal development. This is consistent with our previous work in *D.*  
227 *melanogaster* and *C. elegans* where we demonstrated that the XRN1 homologues are required for  
228 wound healing and epithelial sheet closure (Newbury and Woollard 2004, Grima et al. 2008).  
229 Movement of cell layers over other cells is also relevant for this solid cancer. We also observed a  
230 strong enrichment of transcripts involved in synaptic transmission suggesting a role for XRN1 in  
231 neuronal regulation. This is consistent with data showing that XRN1 forms discrete clusters

232 associated with the post-synapse in hippocampal neurons and its knockdown impairs the  
233 translational repression triggered by NMDA (N- methyl-D-aspartate) (Luchelli et al. 2015).  
234 To discriminate between the functional roles of transcripts directly and indirectly regulated by XRN1  
235 we repeated our GO analysis with the specific sets of transcriptionally or post-transcriptionally up- or  
236 down-regulated transcripts (Fig 4B). This revealed that transcripts directly regulated by XRN1 have  
237 roles in cell morphogenesis and neurogenesis. Further, transcriptionally upregulated and post-  
238 transcriptionally down regulated genes are involved in a range of processes including epithelial  
239 development and cell migration. These analyses also demonstrate that transcriptionally  
240 downregulated genes are involved in cell signaling including the regulation of MAPK signaling.

#### 241 **XRN1-sensitive transcripts demonstrate specific characteristics**

242 Having identified transcriptional and post-transcriptional changes in gene expression following XRN1  
243 knockdown in SAOS-2 cells, we wished to identify specific features or characteristics that may render  
244 the transcripts susceptible to XRN1-mediated decay. We first assessed the types of transcripts  
245 affected by loss of XRN1. A genome-wide assessment of transcript proportions detected in our  
246 samples revealed that 85.5% of detected RNAs were protein coding, 11.3% were lncRNAs, 3.1% were  
247 pseudogenes and the final <0.01% were classified as “other” transcripts (Fig 5A). Interestingly,  
248 whilst our transcriptionally up and down regulated groups mirrored the same proportions as the  
249 genome wide samples, ncRNAs appeared to be enriched amongst the post-transcriptionally  
250 upregulated genes with lncRNAs and pseudogenes representing 17.16% and 6% of the transcripts  
251 respectively (Fig 5A). Whilst the majority of misregulated transcripts were still protein coding  
252 (76.9%) this suggests that XRN1 directly regulates both mRNAs and ncRNAs in SAOS-2 cells. Of note  
253 is the post-transcriptional increase in expression of the lncRNA *HOTAIR* (2.11-fold, FDR<0.001) which  
254 is known to be upregulated in osteosarcoma cells and to contribute to disease progression (Wang et  
255 al. 2015, Li et al. 2017), suggesting a potential mechanistic link between XRN1-targets and  
256 osteosarcoma progression. Strikingly, lncRNAs were depleted from the post-transcriptionally

257 downregulated transcripts (3% of the group). A possible explanation for this is that XRN1 normally  
258 targets miRNAs or transcripts encoding RNA binding proteins, which are then expressed at higher  
259 levels resulting in lower levels of their own target transcripts (Fig 5A).

260 Due to the enrichment of ncRNAs within the post-transcriptionally upregulated data set we next  
261 searched for features of these specific ncRNAs that may render them sensitive to XRN1-mediated  
262 decay. We first observed that the post-transcriptionally upregulated ncRNAs are usually expressed at  
263 low levels in control SAOS-2 cells (Fig 5B/C). We hypothesise that these ncRNAs are normally  
264 maintained at low levels of expression as a result of XRN1-mediated degradation. Interestingly, the  
265 post-transcriptionally regulated ncRNAs have a higher GC content than the genome average (Fig 5D,  
266 grey) or those that are transcriptionally regulated (Fig 5D orange/blue). We also observed a slight  
267 reduction in GC content in those transcripts that are transcriptionally downregulated (Fig 5D, blue).  
268 It is important to note that there are only 7 post-transcriptionally downregulated ncRNAs (Fig 5D,  
269 purple) and therefore this data must be interpreted with caution. Finally, ncRNAs that are post-  
270 transcriptionally regulated are much shorter than the genome average or those that are either up-  
271 or downregulated in a transcriptional manner (Fig 5E).

272 Next, we set out to assess if these transcript characteristics were specific to ncRNAs or if they were  
273 observed across all the transcripts post-transcriptionally regulated by XRN1. We observed the same  
274 pattern in expression levels and GC content that was previously observed specifically for the ncRNAs  
275 suggesting XRN1-sensitive transcripts are at low levels of expression in control cells and have a  
276 higher GC content than the genome average (discussed later) (Fig 6A/B). A collection of recent  
277 studies have shown that XRN1 is able to directly interact with the ribosome and that the level of  
278 translation can influence the stability of an mRNA transcript (Hanson et al. 2018, Tesina et al. 2019,  
279 Wu et al. 2019). To test if XRN1 targets have specific translational features we utilised published  
280 ribosome profiling data. As ribosome profiling data is not available for SAOS-2 cells, we used  
281 published data from an alternative osteosarcoma cell line, U-2 OS (Jang et al. 2015). This revealed

282 that upregulated transcripts are usually translated in a less efficient manner than the genome  
283 average (Fig 6C).

284 Finally, to specifically assess the features of mRNAs and compare with the previous ncRNA analyses  
285 we assessed the lengths of the major defined regions of an mRNA, the 5' and 3' Untranslated  
286 Regions (UTRs) and the coding sequence (CDS). This revealed that direct, post-transcriptional targets  
287 of XRN1 have shorter 5'UTRs than the genome average (272.5bp vs 401.1bp respectively,  $p < 0.001$ )  
288 whilst the CDS was marginally longer and the 3'UTR was slightly shorter than the genome average  
289 (Fig 6D-F). Interestingly, the post-transcriptionally downregulated genes had a shorter CDS than the  
290 genome average, a phenomenon unique to this group of transcripts (1062.0bp vs 1600.9bp  
291 respectively,  $p < 0.001$ ) (Fig 6D-F). This suggests that these transcripts may have disproportionately  
292 long 3' UTRs, which may render them susceptible to post-transcriptional regulators such as miRNAs  
293 and RNA binding proteins. Summary statistics for these analyses are shown in Tables 5/6.

#### 294 **Specific motifs may render transcripts susceptible to XRN1-mediated decay**

295 mRNA 3'UTRs are known to control stability through *cis-acting* elements such as AU-rich elements  
296 (AREs). Therefore, we hypothesised that transcripts showing post-transcriptional upregulation (i.e.  
297 direct XRN1 sensitivity) may contain specific sequence motifs that allow for their targeting to XRN1  
298 through interaction with other RNA binding proteins. To this end we used MEME (Bailey et al. 2009)  
299 to search the 3'UTR of 103 post-transcriptionally upregulated mRNAs for enriched motifs that may  
300 confer XRN1-sensitivity. This analysis revealed a section of significantly enriched motifs, of which 2  
301 stood out; a G-rich motif (in 69/103 UTRs (67.0%)) and a second strong GU-rich motif in 10 (9.7%) of  
302 the 3'UTRs. Of the transcripts containing the GU-rich motif, all but one also include the G-rich motif  
303 (Supplemental File 2). Interestingly, GU-rich elements have been shown to function similar to AREs  
304 in promoting RNA decay so it is possible that GU-rich element binding proteins, such as the  
305 BRUNO/CELF family (Vlasova et al. 2008, Halees et al. 2011), may bind and promote 5'-3' decay by  
306 XRN1. The most common motif shows a strong string of guanine residues which fulfill the criteria of

307 forming G-quadruplexes. Recent work has shown that G-quadruplexes within 3' UTRs play important  
308 regulatory roles and consistent with the findings here, XRN1 has been shown to degrade transcripts  
309 containing G-rich regions more efficiently (Bashkirov et al. 1997).

310 Finally, as we also observed an enrichment of ncRNAs within the post-transcriptionally regulated  
311 transcripts, we performed a similar analysis using the whole ncRNA sequence to assess if similar  
312 motifs are identified. Analysis of the 30 post-transcriptionally regulated ncRNAs revealed a strikingly  
313 similar G-rich motif to that discussed above in 21 of the 30 submitted transcripts (70%). A total of 89  
314 G-rich motifs were identified across these 21 transcripts with 6 sites within the ncRNA *HOTAIR*.  
315 These analyses suggest that this G-rich motif, which is likely to form G-quadruplex structures, is also  
316 able to sensitise specific transcripts to XRN1-mediated degradation in osteosarcoma cells. This  
317 novel finding suggests a new way that transcripts can be targeted for degradation by XRN1.

## 318 **DISCUSSION**

319 Here we have expanded on previous findings using cell lines and patient samples to show that *XRN1*  
320 expression is reduced in osteosarcoma cells as well as in the cells of the related Ewing sarcoma.  
321 Using RNA-sequencing of XRN1 depleted SAOS-2 cells we performed a detailed genome-wide  
322 assessment of gene expression. We differentiated between transcriptional and post-transcriptional  
323 changes in expression and present a list of 134 transcripts that are likely to be direct targets of XRN1.  
324 Gene ontology analysis of differentially expressed transcripts revealed strong enrichment of  
325 transcripts associated with cell migration; a critical process required for cancer progression. This  
326 result is consistent with our previous findings in *D. melanogaster* and *C. elegans*, where depletion of  
327 Pacman or Xrn-1 result in defects in cell migration during embryonic dorsal closure and ventral  
328 enclosure respectively (Newbury and Woollard 2004, Grima et al. 2008). Transcripts directly  
329 regulated by XRN1 also appear to have roles in neurogenesis and neuron projection. Interestingly,  
330 proteins known to bind GU-rich regions, as identified in the MEME analysis have also been shown to  
331 be important regulators of neuronal gene regulation (Gallo and Spickett 2010, Dasgupta and Ladd

332 2012), and XRN1 activity may be important in the neurodegenerative disorder intranuclear inclusion  
333 body disease (Mori et al. 2018). XRN1 has also previously been shown to be localised in XRN1-  
334 positive bodies at the post-synapse in neurones where it contributes to local translational silencing  
335 elicited by NMDA (Luchelli et al. 2015).

336 Although RNA-sequencing revealed a number of transcripts that become misexpressed following  
337 loss of XRN1 in SAOS-2 cells, we observed no additional phenotypic defects within these cells. This is  
338 in contrast to XRN1 knockout HEK-293 cells which showed a 2-fold reduction in growth (Gilbertson  
339 et al. 2018). Although our RNA-sequencing experiments revealed differential expression of  
340 transcripts involved in regulating cell migration, migration rates over 30 hours were no different  
341 between XRN1-depleted and control cells. This could, however, be due to the use of RNA  
342 interference to deplete XRN1. Whilst we achieved a strong and consistent knockdown of ~80%, the  
343 20% remaining may have sufficient residual activity to maintain cellular homeostasis. It is also  
344 possible that the changes in expression observed here were not sufficient in magnitude to elicit a  
345 phenotypic change. The lack of phenotype is intriguing given that deletion of the XRN1 homologue in  
346 *D. melanogaster*, Pacman, has severe phenotypic effects resulting in widespread apoptosis,  
347 reduction in tissue growth and male fertility, developmental delay and subsequent pupal lethality  
348 (Zabolotskaya et al. 2008, Jones et al. 2013, Waldron et al. 2015, Jones et al. 2016). The extensive  
349 conservation of XRN1 throughout eukaryotes suggests it has a critical function in maintaining  
350 homeostasis, however it is possible that in immortalised cell lines the role is less important. Another  
351 possibility is that SAOS-2 cells carry mutations that affect pathways redundant with XRN1 and  
352 therefore depletion of XRN1 may not present phenotypic effects. It is also conceivable that XRN1 in  
353 humans has a critical developmental role, as observed by the developmental phenotypes in *D.*  
354 *melanogaster* and *C. elegans* but these functions are specifically required in normal, multicellular  
355 tissues, rather than individual immortalised cells grown in culture.

356 We have identified specific sets of transcripts that are sensitive to XRN1 activity, including those  
357 directly regulated and those that are indirectly affected. We show that XRN1 is crucial for the direct  
358 regulation of both coding and noncoding RNAs, including the oncogenic lncRNA *HOTAIR*. Increased  
359 expression of *HOTAIR* has been shown to promote proliferation and metastasis of a variety of  
360 cancers (Özeş et al. 2016, Sharma Saha et al. 2016, Deng et al. 2017, Sun et al. 2017) and crucially  
361 has been frequently implicated in the progression of osteosarcoma (Wang et al. 2015, Li et al. 2017).  
362 Within these transcripts we identified specific motifs enriched in transcripts post-transcriptionally  
363 upregulated following XRN1 depletion, including a striking G-rich motif which is present in both  
364 mRNAs and ncRNAs directly regulated by XRN1. Recent work has shown that G-rich regions, that are  
365 capable of forming G-quadruplex structures, are crucial regulators of gene expression (Huppert et al.  
366 2008). XRN1 shows increased efficiency of degrading transcripts containing G-rich regions (Bashkirov  
367 et al. 1997) and therefore it is possible that stretches of Guanine residues sensitise transcripts to  
368 XRN1-mediated decay, perhaps by the binding of particular RNA-binding proteins to GU rich regions,  
369 such as members of the CELF family, which in turn promote their decay via XRN1. Our results are  
370 also consistent with a previous study using HeLa and HCT116 cells, where transcripts with higher GC  
371 content are more sensitive to enzymes in the 5'-3' degradation pathway such as DDX6 and XRN1  
372 (Courel et al. 2019). The presence of this motif may also explain the increase in GC content in  
373 transcripts that show post-transcriptional upregulation. The ability of XRN1 to degrade G-rich RNAs  
374 is likely to be crucial as work on the cytoplasmic 3'-5' ribonuclease Dis3L2 in *D. melanogaster* has  
375 revealed that Dis3L2 shows reduced efficiency for Guanine nucleotides and an absence of G-rich  
376 motifs within Dis3L2 targets (Reimão-Pinto et al. 2016, Towler et al. 2019). These transcripts may  
377 therefore normally depend on XRN1 for their degradation.

378 The data presented here also showed that XRN1 targets are normally maintained at low levels of  
379 expression and are likely to be rapidly turned over, similar to signatures of a number of oncogenes.  
380 Recent work in mouse embryonic stem cells has shown that XRN1 is directly recruited to the  
381 ribosome to remove transcripts that show reduced or stalled translation (Tuck et al. 2020). This is

382 congruent with our findings that direct targets of XRN1 show reduced translational efficiency. It is  
383 possible that in the absence of XRN1, stalled/slowly translating ribosomes remain in contact with the  
384 RNA, increasing the chance of translational errors, which in turn could have detrimental effects upon  
385 the cell. Finally, XRN1-sensitive transcripts also tended to be shorter than the genome average, with  
386 shorter 5'UTRs. 5'UTRs are generally highly structured, therefore a shorter 5' UTR may result in a  
387 reduction of structure that would facilitate XRN1 activity. We also observe an array of indirect  
388 transcriptional changes in expression in XRN1-depleted SAOS-2 cells. This could be explained by  
389 recent work demonstrating that changes in expression or activity of XRN1 results in relocation of a  
390 number of RNA binding proteins. This includes other members of the decay machinery, which affect  
391 the mRNA-decay-RNA polymerase II transcriptional feedback loop (Abernathy et al. 2015, Gilbertson  
392 et al. 2018). Since an increase in XRN1 activity results in the relocation of a number of RNA binding  
393 proteins to the nucleus, it is possible that depletion of XRN1 causes these proteins to remain in the  
394 cytoplasm, contributing to the post-transcriptional downregulation of transcripts that we also  
395 observed here.

396 Taken together, the analyses presented in this study identify a number of features in coding and  
397 non-coding RNAs that may sensitise transcripts to XRN1-mediated decay. We present a group of high  
398 confidence direct targets of XRN1 in addition to a large group of transcripts that show indirect  
399 sensitivity to the ribonuclease. In the future, it would be of great interest to examine the identified  
400 motifs and features of these RNAs and begin to build a mechanism to explain the specificity of XRN1  
401 targeting. This will shed light on the reasons for the selective downregulation of XRN1 in osteo- and  
402 Ewing- sarcoma cells.

## 403 **MATERIALS & METHODS**

### 404 **Cell culture**

405 Osteosarcoma cell lines, HOS, SAOS-2 and U-2 OS (ECACC), were cultured in DMEM-F12 (Gibco  
406 #21331-020) medium supplemented with 10% FBS (PAN-Biotech #P40-37100), 2mM L-Gln (Gibco



407 #25030-024) and 100IU/mL penicillin, 100µg streptomycin (Gibco #15140-122). Cells were cultured  
408 at 37°C in a humidified incubator at 5% CO<sub>2</sub>. The foetal osteoblast cell line HOb (hFOB 1.19) (ECACC)  
409 was cultured in the same conditions. Ewing Sarcoma cell line, SK-ES-1 was cultured in McCoy's 5A  
410 (Modified) medium (Gibco #26600-080) supplemented with 10% FBS, 2mM L-Gln and 100IU/mL  
411 penicillin, 100µg streptomycin. RD-ES was cultured in RPMI 1640 medium (Gibco #12633-020)  
412 supplemented in the same way. These Ewing sarcoma cell lines were provided by Prof. Sue Burchill,  
413 University of Leeds. Both were incubated at 37°C in a 5% CO<sub>2</sub> humidified incubator.

#### 414 **Patient samples**

415 Samples were released by the Children's Cancer and Leukaemia Group (CCLG) and sample details are  
416 outlined in Supplemental Table 1. Samples 11/650, 12/299 and 16/755 displayed large necrosis of  
417 the sample, and so were not included in analysis. Details of sample 16/591 were not disclosed.

#### 418 **Western blotting**

419 Western blots were performed on pellets of 1x10<sup>6</sup> cells. Samples were run on 7% Tris-acetate Novex  
420 gels, apart from those used for SUnSET labelling, where samples were run on 4-12% Bis-Tris Novex  
421 gradient gels. GAPDH or Tubulin were used as loading controls. Blots were blocked in either 5% milk  
422 in 0.1% PBS-Tween or Odyssey Blocking Buffer (LI-COR #927-40000). Primary antibodies used were  
423 Mouse anti-GAPDH (1:10,000, Abcam #ab8245), Mouse anti-Tubulin (1:2000, Sigma #T9026) and  
424 Rabbit anti-XRN1 (1:2000, Bethyl Labs #A300-443A). Anti-mouse and anti-rabbit fluorescent  
425 antibodies were used at 1:20,000 (LICOR Donkey anti-mouse IR Dye 800CW and Goat anti-rabbit  
426 IRDye 680RD). Detection and quantification were performed using the LI-COR Odyssey Fc imager and  
427 Image Studio (version 5.2).

#### 428 **qRT-PCR analysis**

429 Total RNA was isolated from cell pellets and patient samples using a miRNeasy mini kit (Qiagen  
430 #217084) with on-column DNase digestion (Qiagen #79254). RNA concentrations were measured on

431 a NanoDrop One spectrophotometer. Total RNA was converted to cDNA in duplicate using the High  
432 Capacity Reverse Transcription Kit (Applied Biosystems #4368814) and 500ng of RNA (according to  
433 manufacturer's instructions) with random primers. A control 'no RT' reaction was performed in  
434 parallel to confirm that all genomic DNA had been degraded. qRT-PCRs were carried out on each  
435 cDNA replicate in duplicate (for a total of 4 technical replicates) using TaqMan Universal PCR Master  
436 Mix, No AmpErase UNG (Applied Biosystems #4324018) and TaqMan specific assays on a ViiA 7 or  
437 QuantStudio 7 machine. For the production of the custom pre-XRN1 assay, the pre-mRNA sequence  
438 was submitted to Life Technologies' web-based custom TaqMan Assay Design Tool as in (Jones *et al.*  
439 2013). Standard TaqMan assays used in this study were to *XRN1* (ID:Hs00943063), *XRN2*  
440 (ID:Hs01082225), *DIS3* (ID:Hs0020014), *DIS3L1* (ID:Hs00370241) and *DIS3L2* (ID:Hs04966835).  
441 *GADPH* (ID:Hs02786624), *HPRT1* (ID:Hs02800695) or *PES1* (ID:Hs04963002) were used for  
442 normalisation.

#### 443 **RNAi-mediated factor depletion**

444 For siRNA transfections,  $3 \times 10^5$  SAOS-2 cells were seeded in a 6-well plate (34.8mm diameter).  
445 Transfections were carried out using Lipofectamine RNAiMAX reagent (Invitrogen #13778100)  
446 according to manufacturer's instructions using Opti-MEM medium (Gibco #31985070) and DMEM-  
447 F12 medium without antibiotic. For each transfection, 20pmol of either siXRN1 (targeting exon 11,  
448 Invitrogen #125199) or siScrambled (Invitrogen #AM4611) were added for depletion of XRN1. For  
449 control cells 20pmol scrambled siRNA was added. siRNA was removed after 24 hours and replaced  
450 with fresh media.

#### 451 **Phenotyping assays**

452 Apoptosis assays were performed using Caspase-Glo 3/7 reagent according to manufacturer's  
453 instructions (Promega #0000239042). Cell viability assays were performed using WST-1 cell viability  
454 reagent according to manufacturer's instructions (Sigma #18993700). In both assays,  $2 \times 10^4$  cells  
455 were plated in black-walled 96-well plates overnight. XRN1 was knocked down using 5pmols siRNA

456 in full medium and incubated for 24hrs. The reagent was then applied and luminescence (Caspase-  
457 Glow 3/7) or absorbance (WST-1) was measured on a plate reader. SUnSET labelling was performed  
458 using 2.5µg/mL puromycin (Merck #540411) incorporated into  $4 \times 10^5$  cells in 6-well plates where  
459 XRN1 had been knocked down for 24hrs. Puromycin was added for 1hr before cells were harvested  
460 and western blotting performed with GAPDH as a loading control, using an anti-puromycin antibody  
461 (Merck #MABE343). Puromycin incorporation was measured using Image Studio (version 5.2). Cell  
462 proliferation was determined by measuring Brd-U incorporation during DNA synthesis. Briefly, 10µM  
463 Brd-U (Sigma #B5002-100MG) was added to  $5 \times 10^4$  cells in a 24 well plate 24hrs post transfection  
464 with either siXRN1 or siScrambled (10pmols) for 6 hrs. Cells were subsequently fixed in 4%  
465 paraformaldehyde and permeabilised for 45 minutes in 0.3% Triton X-100 in PBS (PBTX). Following  
466 permeabilisation cells with incubated for 30 mins in 4M HCl follow by a 10-minute incubation in  
467 0.1M sodium borate. Following washes in PBTX cells were incubated in αBrd-U diluted 1:20 in PBTX  
468 (Developmental Studies Hybridoma Bank G3G4). Cells were wased in PBTX before incubation in α-  
469 Mouse-Cy3 1:350 (Jackson ImmunoResearch #715-165-150). Cells were then washed in PBTX and  
470 mounted in Vectorshield containing DAPI (Vector Laboratories #H-1200). The ImageJ Dead\_Easy  
471 Mitoglia Plug-In was used to measure the proportion of cells undergoing active DNA synthesis with  
472 the total number of cells counted using DAPI staining.

#### 473 **RNA seq sample preparation and RNA library preparation**

474 RNA was extracted from cell pellets, six replicates from siScrambled or siXRN1 treated cells were  
475 collected for sequencing over consecutive weeks. Total RNA was extracted using miRNEasy mini kit  
476 (Qiagen) with on-column DNase digestion (Qiagen). Total RNA concentration and quality were  
477 measured on a NanoDrop One, RNA integrity was assessed on an Agilent 2100 Bioanalyzer. RNA  
478 concentration was further assessed on a Qubit (Invitrogen). 500ng of total RNA was depleted for  
479 rRNA by Leeds Genomics using the Ribo-Zero kit. Library preparation was also performed by Leeds  
480 Genomics using the Illumina TruSeq standard protocol. Subsequent libraries were run in a 75bp

481 single-end sequencing run on a Next Seq generating between 36 and 45 million reads per sample.

482 Raw sequencing reads will be deposited in ArrayExpress following manuscript acceptance.

### 483 **Bioinformatic analysis of RNA-sequencing data**

484 Sequence quality was assessed using FastQc c0.11.7

485 (<http://www.bioinformatics.babraham.ac.uk/projects/fastqc/>) and adapters were removed using

486 Scythe v0.993b (<https://github.com/vsbuffalo/scythe>). Further quality control and read trimming

487 was achieved using Sickle v1.29 (<https://github.com/najoshi/sickle>). The remaining high quality

488 reads were mapped to the human genome GRCh38.93 from Ensembl using HiSat2 v2.01.0 (Kim et al.

489 2015) and SAM files were sorted and converted to BAM using SAMtools (Li et al. 2009). Paired

490 analysis of control and knockdown cells was achieved using featureCounts (Liao et al. 2014) and

491 edgeR (Robinson et al. 2010). Mapped reads were counted using featureCounts using GrCh38.93.gtf

492 from Ensembl. Reads were counted at either the Gene, Exon or Intron level. For Intron data a novel

493 .gtf file was computed from the exon boundaries within the original GRCh38.93.gtf. Only genes with

494 a sum of 60 reads across the 12 biological replicates were retained for further analysis. Raw counts

495 were used as an input for normalisation, quantification and differential expression analysis in edgeR.

496 Transcripts were further filtered within edgeR and only those expressed in >10 samples were

497 retained. Counts were then normalised and differential expression was assessed in a pairwise

498 manner using the quasi likelihood F test where siXRN1 replicate 1 was compared to siScr replicate 1

499 and so on. Differentially expressed genes were initially determined as those showing a fold change

500 of >2-fold and an FDR of <0.05. The same procedure was used for Exon and Intron level assessment,

501 although intron reads were not filtered as this may have removed post-transcriptional changes.

502 Post-transcriptional changes were determined as exon level changes of >2-fold and an FDR<0.05 and

503 intron level changes of <2 fold or an FDR>0.05. The genes than showed changes at the exon and

504 intron levels of >2 fold and an FDR<0.05 were classified as transcriptional changes.

### 505 **Data used that was not produced in this study**

506 Translational efficiency data from U-2 OS cells was obtained from Jang et al 2015 where an average  
507 of all recorded time points was used. GC content and locus length were obtained from Ensembl  
508 using the BioMart tool.

#### 509 **Gene Ontology and motif analysis**

510 Functional annotation clustering of the differentially expressed genes was carried out using DAVID  
511 (Huang da et al. 2009, Huang da et al. 2009). Only the significantly enriched GO terms from the  
512 biological process category (BPFAT, using highest stringency and an enrichment score >1.3) were  
513 included in further analysis. 3'UTR and ncRNA motif analysis was conducted using the Meme Suite  
514 (Bailey et al. 2009).

#### 515 **Statistical tests**

516 All statistical analyses were performed in GraphPad Prism 8 or R (version 3.6.3). Unpaired Student t-  
517 tests were used to compare the means of single test groups to single control groups. Paired analysis  
518 with the quasi likelihood F test was used to determine differential gene expression using edgeR as  
519 outlined above. Welch's two sample t-tests was used to determine significant changes in transcript  
520 features.

#### 521 **ACKNOWLEDGEMENTS**

522 The authors wish to thank Helen Stewart, Peter Bush, Sophie Robinson, Lisa Mullen and Stefano  
523 Caserta for helpful discussions. We would also like to thank Clare Rizzo-Singh for technical help and  
524 Sue Burchill (University of Leeds) for providing the Ewing sarcoma cell lines. Osteosarcoma samples  
525 were provided by the Children's Cancer and Leukaemia Group (CCLG). This work was funded by a  
526 University of Brighton studentship [WC003-30] to A.L.P, a University of Brighton "Rising Stars  
527 Initiative" grant to C.I.J and S.F.N (WB002-34) and a Sussex Research Development grant to S.F.N and  
528 C.I.J (WC001-08). B.P.T was financed by a Biotechnology and Biological Sciences Research Council  
529 grant (BB/P021042/1) to S.F.N.

530 **AUTHOR CONTRIBUTIONS**

531 A.L.P designed and performed most of the experiments and analysed some of the data. C.I.J.  
532 supervised and carried out the initial work, advised on the bioinformatics experiments and  
533 commented on the manuscript. T.B performed and analysed the experiments on Ewing sarcoma  
534 cells. B.P.T analysed and interpreted the RNA-seq data, prepared the Figures and wrote the majority  
535 of the manuscript. S.F.N. co-ordinated the study, contributed to the design and interpretation of the  
536 experiments and contributed to the writing of the manuscript.

537 **CONFLICT OF INTEREST**

538 The authors declare that there is no conflict of interest.

539 **REFERENCES**

540 Abernathy, E., S. Gilbertson, R. Alla and B. Glaunsinger (2015). "Viral Nucleases Induce an mRNA  
541 Degradation-Transcription Feedback Loop in Mammalian Cells." Cell Host Microbe **18**(2): 243-253.

542 Astuti, D., M. R. Morris, W. N. Cooper, R. H. Staals, N. C. Wake, G. A. Fews, H. Gill, D. Gentle, S. Shuib,  
543 C. J. Ricketts, et al. (2012). "Germline mutations in DIS3L2 cause the Perlman syndrome of  
544 overgrowth and Wilms tumor susceptibility." Nat Genet **44**(3): 277-284.

545 Bailey, T. L., M. Boden, F. A. Buske, M. Frith, C. E. Grant, L. Clementi, J. Ren, W. W. Li and W. S. Noble  
546 (2009). "MEME SUITE: tools for motif discovery and searching." Nucleic Acids Res **37**(Web Server  
547 issue): W202-208.

548 Bashkirov, V. I., H. Scherthan, J. A. Solinger, J. M. Buerstedde and W. D. Heyer (1997). "A mouse  
549 cytoplasmic exoribonuclease (mXRN1p) with preference for G4 tetraplex substrates." J Cell Biol  
550 **136**(4): 761-773.

551 Blasco-Moreno, B., L. de Campos-Mata, R. Böttcher, J. García-Martínez, J. Jungfleisch, D. D.  
552 Nedialkova, S. Chattopadhyay, M. E. Gas, B. Oliva, J. E. Pérez-Ortín, et al. (2019). "The exonuclease

553 Xrn1 activates transcription and translation of mRNAs encoding membrane proteins." Nat Commun  
554 **10**(1): 1298.

555 Boehm, V., J. V. Gerbracht, M. C. Marx and N. H. Gehring (2016). "Interrogating the degradation  
556 pathways of unstable mRNAs with XRN1-resistant sequences." Nat Commun **7**: 13691.

557 Braun, J. E., V. Truffault, A. Boland, E. Huntzinger, C. T. Chang, G. Haas, O. Weichenrieder, M. Coles  
558 and E. Izaurralde (2012). "A direct interaction between DCP1 and XRN1 couples mRNA decapping to  
559 5' exonucleolytic degradation." Nat Struct Mol Biol **19**(12): 1324-1331.

560 Chapman, E. G., S. L. Moon, J. Wilusz and J. S. Kieft (2014). "RNA structures that resist degradation by  
561 Xrn1 produce a pathogenic Dengue virus RNA." Elife **3**: e01892.

562 Colombani, J., D. S. Andersen and P. Léopold (2012). "Secreted peptide Dilp8 coordinates Drosophila  
563 tissue growth with developmental timing." Science **336**(6081): 582-585.

564 Courel, M., Y. Clément, C. Bossevain, D. Foretek, O. Vidal Cruchez, Z. Yi, M. Bénard, M. N. Benassy,  
565 M. Kress, C. Vindry, et al. (2019). "GC content shapes mRNA storage and decay in human cells." Elife  
566 **8**.

567 Dasgupta, T. and A. N. Ladd (2012). "The importance of CELF control: molecular and biological roles  
568 of the CUG-BP, Elav-like family of RNA-binding proteins." Wiley Interdiscip Rev RNA **3**(1): 104-121.

569 Deng, J., M. Yang, R. Jiang, N. An, X. Wang and B. Liu (2017). "Long Non-Coding RNA HOTAIR  
570 Regulates the Proliferation, Self-Renewal Capacity, Tumor Formation and Migration of the Cancer  
571 Stem-Like Cell (CSC) Subpopulation Enriched from Breast Cancer Cells." PLoS One **12**(1): e0170860.

572 Gallo, J. M. and C. Spickett (2010). "The role of CELF proteins in neurological disorders." RNA Biol  
573 **7**(4): 474-479.

574 Gilbertson, S., J. D. Federspiel, E. Hartenian, I. M. Cristea and B. Glaunsinger (2018). "Changes in  
575 mRNA abundance drive shuttling of RNA binding proteins, linking cytoplasmic RNA degradation to  
576 transcription." Elife **7**.

577 Grima, D. P., M. Sullivan, M. V. Zabolotskaya, C. Browne, J. Seago, K. C. Wan, Y. Okada and S. F.  
578 Newbury (2008). "The 5'-3' exoribonuclease pacman is required for epithelial sheet sealing in  
579 *Drosophila* and genetically interacts with the phosphatase puckered." *Biol Cell* **100**(12): 687-701.

580 Halees, A. S., E. Hitti, M. Al-Saif, L. Mahmoud, I. A. Vlasova-St Louis, D. J. Beisang, P. R. Bohjanen and  
581 K. Khabar (2011). "Global assessment of GU-rich regulatory content and function in the human  
582 transcriptome." *RNA Biol* **8**(4): 681-691.

583 Hanahan, D. and R. A. Weinberg (2011). "Hallmarks of cancer: the next generation." *Cell* **144**(5): 646-  
584 674.

585 Hanson, G., N. Alhusaini, N. Morris, T. Sweet and J. Collier (2018). "Translation elongation and mRNA  
586 stability are coupled through the ribosomal A-site." *Rna* **24**(10): 1377-1389.

587 Huang da, W., B. T. Sherman and R. A. Lempicki (2009). "Bioinformatics enrichment tools: paths  
588 toward the comprehensive functional analysis of large gene lists." *Nucleic Acids Res* **37**(1): 1-13.

589 Huang da, W., B. T. Sherman and R. A. Lempicki (2009). "Systematic and integrative analysis of large  
590 gene lists using DAVID bioinformatics resources." *Nat Protoc* **4**(1): 44-57.

591 Huppert, J. L., A. Bugaut, S. Kumari and S. Balasubramanian (2008). "G-quadruplexes: the beginning  
592 and end of UTRs." *Nucleic Acids Res* **36**(19): 6260-6268.

593 Jang, C., N. F. Lahens, J. B. Hogenesch and A. Sehgal (2015). "Ribosome profiling reveals an important  
594 role for translational control in circadian gene expression." *Genome Res* **25**(12): 1836-1847.

595 Jones, C. I., D. P. Grima, J. A. Waldron, S. Jones, H. N. Parker and S. F. Newbury (2013). "The 5'-3'  
596 exoribonuclease Pacman (Xrn1) regulates expression of the heat shock protein Hsp67Bc and the  
597 microRNA miR-277-3p in *Drosophila* wing imaginal discs." *RNA Biol* **10**(8): 1345-1355.

598 Jones, C. I., A. L. Pashler, B. P. Towler, S. R. Robinson and S. F. Newbury (2016). "RNA-seq reveals  
599 post-transcriptional regulation of *Drosophila* insulin-like peptide dilp8 and the neuropeptide-like  
600 precursor Nplp2 by the exoribonuclease Pacman/XRN1." *Nucleic Acids Res* **44**(1): 267-280.



601 Jones, C. I., M. V. Zabolotskaya and S. F. Newbury (2012). "The 5' → 3' exoribonuclease  
602 XRN1/Pacman and its functions in cellular processes and development." Wiley Interdiscip Rev RNA  
603 **3**(4): 455-468.

604 Kim, D., B. Langmead and S. L. Salzberg (2015). "HISAT: a fast spliced aligner with low memory  
605 requirements." Nat Methods **12**(4): 357-360.

606 Li, E., Z. Zhao, B. Ma and J. Zhang (2017). "Long noncoding RNA HOTAIR promotes the proliferation  
607 and metastasis of osteosarcoma cells through the AKT/mTOR signaling pathway." Exp Ther Med  
608 **14**(6): 5321-5328.

609 Li, H., B. Handsaker, A. Wysoker, T. Fennell, J. Ruan, N. Homer, G. Marth, G. Abecasis and R. Durbin  
610 (2009). "The Sequence Alignment/Map format and SAMtools." Bioinformatics **25**(16): 2078-2079.

611 Liao, Y., G. K. Smyth and W. Shi (2014). "featureCounts: an efficient general purpose program for  
612 assigning sequence reads to genomic features." Bioinformatics **30**(7): 923-930.

613 Luchelli, L., M. G. Thomas and G. L. Boccaccio (2015). "Synaptic control of mRNA translation by  
614 reversible assembly of XRN1 bodies." J Cell Sci **128**(8): 1542-1554.

615 Moon, S. L., J. R. Anderson, Y. Kumagai, C. J. Wilusz, S. Akira, A. A. Khromykh and J. Wilusz (2012). "A  
616 noncoding RNA produced by arthropod-borne flaviviruses inhibits the cellular exoribonuclease XRN1  
617 and alters host mRNA stability." Rna **18**(11): 2029-2040.

618 Moon, S. L., B. J. Dodd, D. E. Brackney, C. J. Wilusz, G. D. Ebel and J. Wilusz (2015). "Flavivirus sRNA  
619 suppresses antiviral RNA interference in cultured cells and mosquitoes and directly interacts with  
620 the RNAi machinery." Virology **485**: 322-329.

621 Mori, F., K. Tanji, Y. Miki, Y. Toyoshima, H. Sasaki, M. Yoshida, A. Kakita, H. Takahashi and K.  
622 Wakabayashi (2018). "Immunohistochemical localization of exoribonucleases (DIS3L2 and XRN1) in  
623 intranuclear inclusion body disease." Neurosci Lett **662**: 389-394.

624 Nagarajan, V. K., P. M. Kukulich, B. von Hagel and P. J. Green (2019). "RNA degradomes reveal  
625 substrates and importance for dark and nitrogen stress responses of Arabidopsis XRN4." Nucleic  
626 Acids Res **47**(17): 9216-9230.

627 Newbury, S. and A. Woollard (2004). "The 5'-3' exoribonuclease xrn-1 is essential for ventral  
628 epithelial enclosure during *C. elegans* embryogenesis." *Rna* **10**(1): 59-65.

629 Özeş, A. R., D. F. Miller, O. N. Özeş, F. Fang, Y. Liu, D. Matei, T. Huang and K. P. Nephew (2016). "NF-  
630 κB-HOTAIR axis links DNA damage response, chemoresistance and cellular senescence in ovarian  
631 cancer." *Oncogene* **35**(41): 5350-5361.

632 Pashler, A. L., B. P. Towler, C. I. Jones and S. F. Newbury (2016). "The roles of the exoribonucleases  
633 DIS3L2 and XRN1 in human disease." *Biochem Soc Trans* **44**(5): 1377-1384.

634 Reimão-Pinto, M. M., R. A. Manzenreither, T. R. Burkard, P. Sledz, M. Jinek, K. Mechtler and S. L.  
635 Ameres (2016). "Molecular basis for cytoplasmic RNA surveillance by uridylation-triggered decay in  
636 *Drosophila*." *Embo j* **35**(22): 2417-2434.

637 Robinson, M. D., D. J. McCarthy and G. K. Smyth (2010). "edgeR: a Bioconductor package for  
638 differential expression analysis of digital gene expression data." *Bioinformatics* **26**(1): 139-140.

639 Sharma Saha, S., R. Roy Chowdhury, N. R. Mondal, B. Chakravarty, T. Chatterjee, S. Roy and S.  
640 Sengupta (2016). "Identification of genetic variation in the lncRNA HOTAIR associated with HPV16-  
641 related cervical cancer pathogenesis." *Cell Oncol (Dordr)* **39**(6): 559-572.

642 Sun, M. Y., J. Y. Zhu, C. Y. Zhang, M. Zhang, Y. N. Song, K. Rahman, L. J. Zhang and H. Zhang (2017).  
643 "Autophagy regulated by lncRNA HOTAIR contributes to the cisplatin-induced resistance in  
644 endometrial cancer cells." *Biotechnol Lett* **39**(10): 1477-1484.

645 Tesina, P., E. Heckel, J. Cheng, M. Fromont-Racine, R. Buschauer, L. Kater, B. Beatrix, O.  
646 Berninghausen, A. Jacquier, T. Becker, et al. (2019). "Structure of the 80S ribosome-Xrn1 nuclease  
647 complex." *Nat Struct Mol Biol* **26**(4): 275-280.

648 Towler, B. P., C. I. Jones, K. L. Harper, J. A. Waldron and S. F. Newbury (2016). "A novel role for the 3'-  
649 5' exoribonuclease Dis3L2 in controlling cell proliferation and tissue growth." *RNA Biol* **13**(12): 1286-  
650 1299.

651 Towler, B. P., C. I. Jones, S. C. Viegas, P. Apura, J. A. Waldron, S. K. Smalley, C. M. Arraiano and S. F.  
652 Newbury (2015). "The 3'-5' exoribonuclease Dis3 regulates the expression of specific microRNAs in  
653 *Drosophila* wing imaginal discs." RNA Biol **12**(7): 728-741.

654 Towler, B. P. and S. F. Newbury (2018). "Regulation of cytoplasmic RNA stability: Lessons from  
655 *Drosophila*." Wiley Interdiscip Rev RNA **9**(6): e1499.

656 Towler, B. P., A. L. Pashler, H. J. Haime, K. M. Przybyl, S. C. Viegas, R. G. Matos, S. J. Morley, C. M.  
657 Arraiano and S. F. Newbury (2019). "Dis3L2 regulates cellular proliferation through a PI3-Kinase  
658 dependent signalling pathway." bioRxiv: 806109.

659 Tuck, A. C., A. Rankova, A. B. Arpat, L. A. Liechti, D. Hess, V. Iesmantavicius, V. Castelo-Szekely, D.  
660 Gatfield and M. Bühler (2020). "Mammalian RNA Decay Pathways Are Highly Specialized and Widely  
661 Linked to Translation." Mol Cell **77**(6): 1222-1236.e1213.

662 Vlasova, I. A., N. M. Tahoe, D. Fan, O. Larsson, B. Rattenbacher, J. R. Sternjohn, J. Vasdewani, G.  
663 Karypis, C. S. Reilly, P. B. Bitterman, et al. (2008). "Conserved GU-rich elements mediate mRNA decay  
664 by binding to CUG-binding protein 1." Mol Cell **29**(2): 263-270.

665 Waldron, J. A., C. I. Jones, B. P. Towler, A. L. Pashler, D. P. Grima, S. Hebbes, S. H. Crossman, M. V.  
666 Zabolotskaya and S. F. Newbury (2015). "Xrn1/Pacman affects apoptosis and regulates expression of  
667 *hid* and *reaper*." Biol Open **4**(5): 649-660.

668 Wang, B., Y. Su, Q. Yang, D. Lv, W. Zhang, K. Tang, H. Wang, R. Zhang and Y. Liu (2015).  
669 "Overexpression of Long Non-Coding RNA HOTAIR Promotes Tumor Growth and Metastasis in  
670 Human Osteosarcoma." Mol Cells **38**(5): 432-440.

671 Wu, Q., S. G. Medina, G. Kushawah, M. L. DeVore, L. A. Castellano, J. M. Hand, M. Wright and A. A.  
672 Bazzini (2019). "Translation affects mRNA stability in a codon-dependent manner in human cells."  
673 Elife **8**.

674 Zabolotskaya, M. V., D. P. Grima, M. D. Lin, T. B. Chou and S. F. Newbury (2008). "The 5'-3'  
675 exoribonuclease Pacman is required for normal male fertility and is dynamically localized in  
676 cytoplasmic particles in *Drosophila* testis cells." Biochem J **416**(3): 327-335.

677 Zhang, K., N. Dion, B. Fuchs, T. Damron, S. Gitelis, R. Irwin, M. O'Connor, H. Schwartz, S. P. Scully, M.

678 G. Rock, et al. (2002). "The human homolog of yeast SEP1 is a novel candidate tumor suppressor

679 gene in osteogenic sarcoma." *Gene* **298**(2): 121-127.

680

681 **TABLES**

682

| Ensembl GeneID  | Gene name  | Fold Change | FDR         |
|-----------------|------------|-------------|-------------|
| ENSG00000237649 | KIFC1      | 15.02       | 3.96E-06    |
| ENSG00000108947 | EFNB3      | 7.51        | 3.85E-06    |
| ENSG00000183798 | EMILIN3    | 7.44        | 1.66E-06    |
| ENSG00000136274 | NACAD      | 5.92        | 1.04E-05    |
| ENSG00000187867 | PALM3      | 5.34        | 0.000127488 |
| ENSG00000264569 | DCXR-DT    | 5.07        | 9.66E-05    |
| ENSG00000186897 | C1QL4      | 4.94        | 1.79E-10    |
| ENSG00000197457 | STMN3      | 4.62        | 0.000610086 |
| ENSG00000246777 | AC044802.1 | 4.34        | 0.000109752 |

| Ensembl GeneID  | Gene name | Fold Change | FDR      |
|-----------------|-----------|-------------|----------|
| ENSG00000164082 | GRM2      | 8.87        | 7.94E-08 |
| ENSG00000236609 | ZNF853    | 8.53        | 4.18E-09 |
| ENSG00000078900 | TP73      | 6.82        | 1.19E-06 |
| ENSG00000166341 | DCHS1     | 6.74        | 6.91E-11 |
| ENSG00000130592 | LSP1      | 6.50        | 2.33E-09 |
| ENSG00000172733 | PURG      | 6.48        | 6.61E-09 |
| ENSG00000088881 | EBF4      | 6.38        | 2.70E-10 |
| ENSG00000141314 | RHBDL3    | 5.80        | 2.08E-11 |
| ENSG00000141750 | STAC2     | 5.69        | 1.42E-08 |

683

684

685

686

687

688

689

690

**Table 3: Post-transcriptionally downregulated**

| Ensembl GeneID   | Gene name  | Fold Change | FDR         |
|------------------|------------|-------------|-------------|
| ENSG00000013275  | PSMC4      | -6.02       | 0.00256824  |
| ENSG000000114942 | EEF1B2     | -5.47       | 0.000815941 |
| ENSG000000105856 | HBP1       | -4.98       | 0.012518938 |
| ENSG000000169429 | CXCL8      | -4.56       | 0.001322715 |
| ENSG000000224163 | AC025594.1 | -4.10       | 0.000509416 |
| ENSG000000174255 | ZNF80      | -4.06       | 3.79E-06    |
| ENSG000000139330 | KERA       | -3.80       | 4.05E-08    |
| ENSG000000117595 | IRF6       | -3.45       | 5.50E-05    |
| ENSG000000175701 | MTLN       | -3.26       | 1.09E-09    |

691

692

**Table 4: Transcriptionally downregulated**

| Ensembl GeneID   | Gene name | Fold Change | FDR         |
|------------------|-----------|-------------|-------------|
| ENSG000000143125 | PROK1     | -8.17       | 0.000158845 |
| ENSG000000179869 | ABCA13    | -8.15       | 1.63E-11    |
| ENSG000000133055 | MYBPH     | -7.18       | 6.98E-12    |
| ENSG000000137673 | MMP7      | -6.32       | 0.000303476 |
| ENSG000000228035 | NGF-AS1   | -6.04       | 5.85E-09    |
| ENSG000000260785 | CASC17    | -5.47       | 1.19E-13    |
| ENSG000000258331 | LINC02461 | -5.34       | 1.29E-07    |
| ENSG000000148677 | ANKRD1    | -5.11       | 3.84E-13    |
| ENSG000000166396 | SERPINB7  | -4.85       | 4.24E-12    |

693

**Table 5: Average size of each mRNA region (bp)**

| Region | Genome | Post-trans up | Trans up | Post-trans down | Trans-down |
|--------|--------|---------------|----------|-----------------|------------|
| 5'UTR  | 401.1  | 272.5         | 427.5    | 382.0           | 364.9      |
| CDS    | 1600.9 | 1697          | 1732.3   | 1062.0          | 1414.6     |
| 3'UTR  | 1819.3 | 1601.7        | 1713.5   | 1676.1          | 1648       |

694

**Table 6: p-value of each comparison vs genome (Welch Two Sample t-test)**

| Region | Post-trans up | Trans up | Post-trans down | Trans-down |
|--------|---------------|----------|-----------------|------------|
| 5'UTR  | <0.001        | 0.3838   | 0.628           | 0.3816     |
| CDS    | 0.4252        | 0.06549  | <0.001          | 0.1066     |
| 3'UTR  | 0.224         | 0.3548   | 0.7476          | 0.364      |

695

696

697

698

699

700 **FIGURE LEGENDS**

701 **Figure 1: XRN1 is downregulated in osteo- and Ewing sarcoma. A)** qRT-PCR quantification of *XRN1*  
702 mRNA expression across osteosarcoma (OS) cell lines in comparison to the HO**b** control cell line,  
703 normalised to *HPRT1*. Error bars represent SEM, n≥5. **B)** qRT-PCR quantification of *pre-XRN1* across  
704 osteosarcoma cell lines in comparison to the HO**b** control cell line, normalised to *HPRT1*. Error bars  
705 represent SEM, n≥6, **C)** qRT-PCR quantification of *XRN1* across osteosarcoma patient samples in  
706 comparison to the HO**b** control cell line, normalised to *PES1*. Error bars represent SEM, n≥5,  
707 p=0.0296. Red = samples from hip and femur, blue=samples from scapula or humerus and  
708 green=unknown origin. **D)** Representative Western blot and graphical analysis showing expression of  
709 XRN1 protein in osteosarcoma cells as a proportion of that expressed in HO**b** control cells. Error bars  
710 represent SEM, n≥4. **E)** qRT-PCR quantification of *XRN1* mRNA expression in Ewing sarcoma (EWS)  
711 cell lines in comparison to the HO**b** control cell line, normalised to *GAPDH*. Error bars represent SEM,  
712 n≥6. **F)** Representative Western blot and graphical analysis showing expression of XRN1 protein in  
713 Ewing sarcoma cells as a proportion of that expressed in HO**b** control cells Error bars represent SEM,  
714 n≥4. For all figures \*\*\*\*=p<0.0001, \*\*=p<0.01 \*=p<0.05 and ns=p>0.05.

715 **Figure 2: XRN1 knockdown in SAOS-2 cells does not result in observable phenotypes. A)** Successful  
716 knockdown of XRN1 in SAOS-2 cells using RNAi 24 hours post transfection. Scr samples treated with  
717 20pmol scrambled siRNA and KD cells treated with 20pmol *XRN1* siRNA. Error bars represent SEM,  
718 \*\*\*=p=0.0008. **B)** Quantification and representative images (40x objective) of the BrdU proliferation  
719 assay. Error bars represent SEM, n≥25, p=0.7938, scale bar=50µM. **C)** WST-1 assay at 24hr time  
720 intervals following transfection with either Scrambled (Scr) or *XRN1* (KD) siRNA. Error bar represent  
721 SEM, n=3. **D)** Caspase Glo 3/4 assay at 24hr time intervals following transfection with either  
722 Scrambled (Scr) or *XRN1* (KD) siRNA. Error bar represent SEM, n=3. **E)** Quantification and  
723 representative images (20x objective) of transwell migration assay 6hrs, 24hrs or 30hrs post seeding.  
724 Seeding was performed 24hrs post transfection with either Scrambled (Scr) or *XRN1* (KD) siRNA.

725 Error bars represent SEM,  $n=4$ ,  $p>0.05$ , scale bar= $100\mu\text{M}$ . **F)** Knockdown of XRN1 does not affect  
726 nascent translation rates. Quantification of Puromycin incorporation or XRN1 expression (normalised  
727 to GAPDH relative to its own scrambled partner) 24hrs post transfection in cells treated with either  
728 Scrambled (Scr) or *XRN1* (KD) siRNA. Error bars represent SEM,  $***=p=0.0003$ ,  $ns=p=0.7432$ ,  $n=5$ .

729 **Figure 3: Overview of RNA-sequencing of XRN1-depleted SAOS-2 cells. A)** Up- (red) and  
730 downregulated (blue) transcripts based on initial edgeR differential expression using genes as a  
731 counting method in featureCounts. **B)** Scrambled vs XRN1 knockdown FPKM based demonstrating  
732 differentially expressed transcripts using both gene and exon counting. Exon FPKM used for direct  
733 comparison with intron counting. Grey=no change, red=post-transcriptionally upregulated,  
734 orange=transcriptionally upregulated, purple=post-transcriptionally downregulated,  
735 blue=transcriptionally downregulated, green=no intron data. **C)** Differentially expressed transcripts  
736 when counting intron mapping reads allowing differentiation between transcriptional and post-  
737 transcriptional changes represented in B. Legend as in B. **D)** MA plot representing fold change in  
738 XRN1-depleted SAOS-2 cells vs transcript expression in control cells coloured by nature of change.  
739 Legend as in B. **E)** Volcano plot demonstrating statistical information of all expressed transcripts.  
740 Legend as in B.

741 **Figure 4: Gene Ontology analysis of differentially expressed transcripts. A)** Gene ontology analysis  
742 using DAVID and Biological processes level "BP FAT" at highest stringency on all differentially  
743 expressed transcripts in XRN1-depleted SAOS-2 cells. **B)** As A, but enriched biological processes  
744 assessed in individual groups of misregulated transcripts.

745 **Figure 5: XRN1 also regulates ncRNAs in SAOS-2 cells. A)** Assessment of transcript proportions  
746 affected by XRN1 depletion relative to the genome wide proportions detected in our sequencing  
747 data. *HOTAIR* highlighted in black, grey=no change, red=post-transcriptionally upregulated,  
748 orange=transcriptionally upregulated, purple=post-transcriptionally downregulated,  
749 blue=transcriptionally downregulated, green=no intron data. **B)** Scatter plot of changes in expression

750 of all ncRNAs detected in our sequencing data. **C-E)** Boxplots of **C)** expression **D)** GC content and **E)**  
751 length (bp) of ncRNAs in our data. Grouped by their nature of change in expression and compared to  
752 the genome average as detected in our data set.

753 **Figure 6: XRN1-sensitive transcripts show specific transcript characteristics.** Boxplots of **A)**  
754 expression, **B)** GC content, **C)** translational efficiency, **D)** 5'UTR length, **E)** coding sequence (CDS)  
755 length and **F)** 3'UTR length of all transcripts within our data set. Grouped by their nature of change  
756 in expression and compared to the genome average as detected in our data set. Translational  
757 efficiency calculated as ribosome protected footprint FPKM/total RNA FPKM for each transcript.

758 **Figure 7: Direct XRN1 targets possess G-rich motifs.** **A/B)** MEME analysis of 3'UTR of 103 mRNAs  
759 reveal **A)** GU rich 18 sites across 10 unique transcripts and **B)** G-rich 233 sites across 69 unique  
760 transcripts, motifs which may confer XRN1 sensitivity. **C)** Similar analysis of 30 ncRNAs post-  
761 transcriptionally upregulated in XRN1-depleted SAOS-2 cells reveals a similar G-rich motif to that  
762 observed in **B)** (89 sites across 21 unique transcripts).

763 **Supplemental Figure 1: Other ribonucleases are not downregulated in osteosarcoma cells.** **A)**  
764 Growth curves of HOS, U-2 OS and SAOS-2 cells. Error bars represent SEM, n=3. **B)** qRT-PCR  
765 assessment of *XRN2*, *DIS3*, *DIS3L1* and *DIS3L2* mRNA in osteosarcoma cell lines relative to the HOb  
766 control, normalised to *HPRT1*. Error bars represent SEM, n ≥3, \*\*\*=p<0.001, \*\*p<0.01, \*p<0.05,  
767 ns=p>0.05.

768 **Supplemental Figure 2: Time course of XRN1 knockdown in SAOS-2 cells.** Representative Western  
769 blot and quantification of all blots in cells treated with siScr (Scambled) or siXRN1 (KD) until 144  
770 hours post transfection. Data presented relative to the paired scrambled control sample on each  
771 blot. Error bars represent SEM, n≥3, \*\*\*=p<0.001, \*\*=p<0.01, \*p<0.05.

772 **Supplemental Figure 3: Optimisation of SuNSET labelling experiments.** Error bars represent SEM  
773 (where n≥3). n≥2.



774 **Supplemental Figure 4: A)** qRT-PCR quantification of *XRN1* mRNA in each individual RNA-sequencing  
775 replicate. Each *XRN1* knockdown replicate shown in pink is compared to its paired scrambled control  
776 (Scr) replicate. Mean and SEM shown. **B)** Hierarchical clustering of RNA-sequencing samples  
777 following edgeR analysis.

778 **Supplemental Figure 5:** Correlation between transcript fold changes between edgeR analyses when  
779 either counting at the “gene” or “exon” level with featureCounts.  $r^2=0.91$ .

780

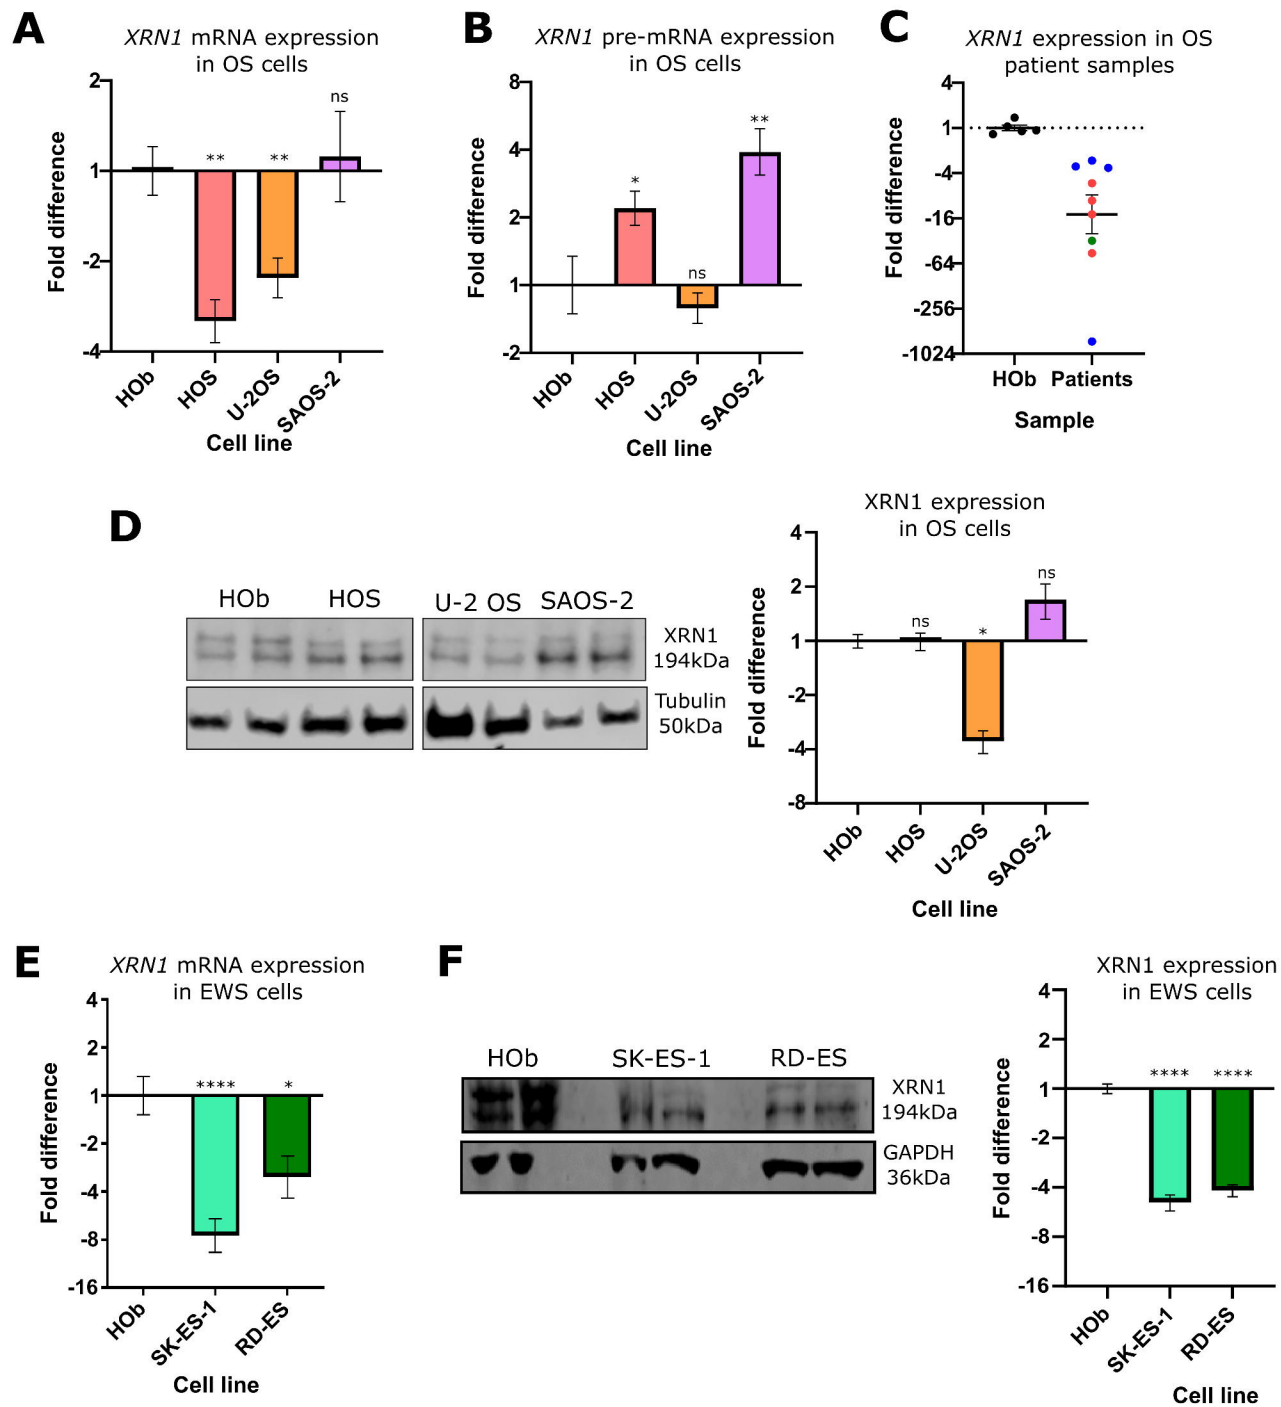

**A**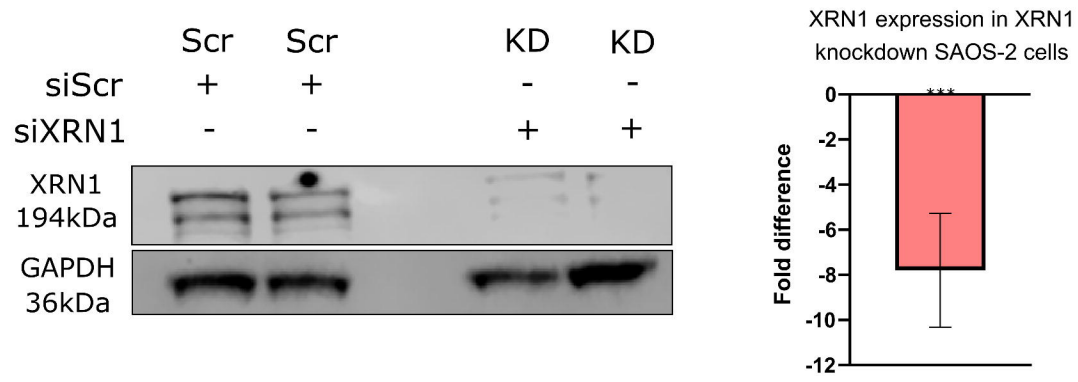**B**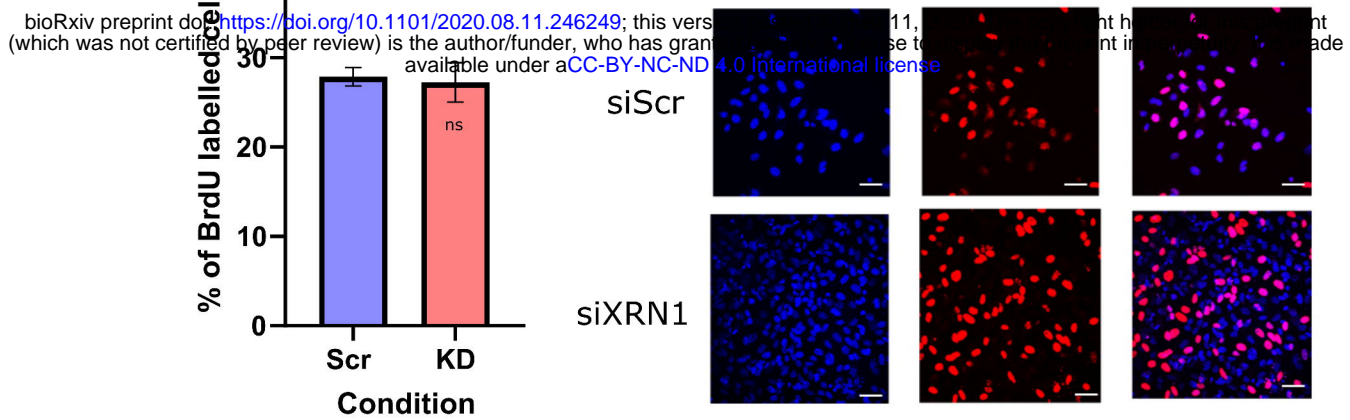**C**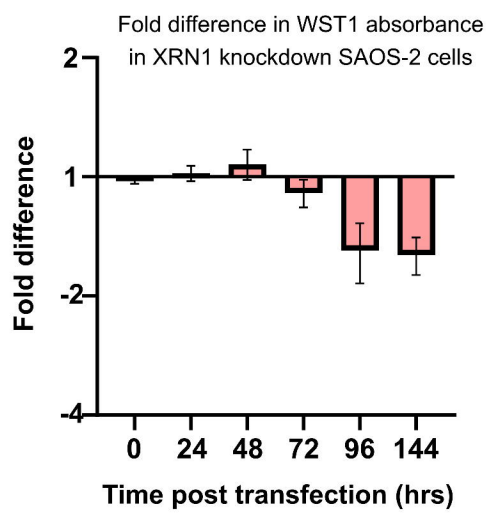**D**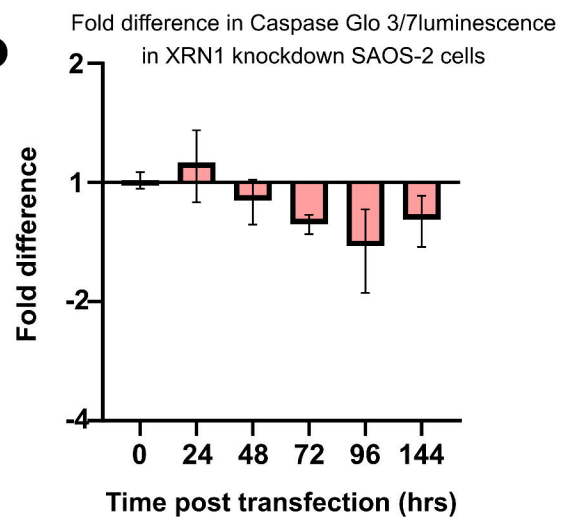**E**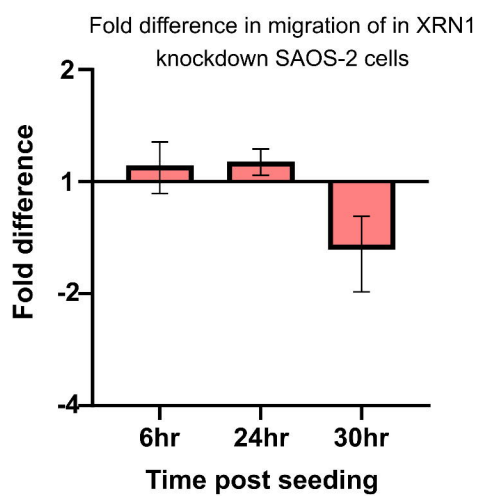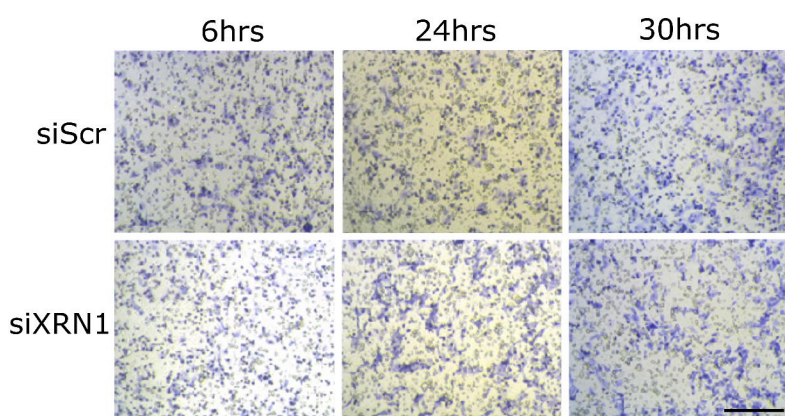**F**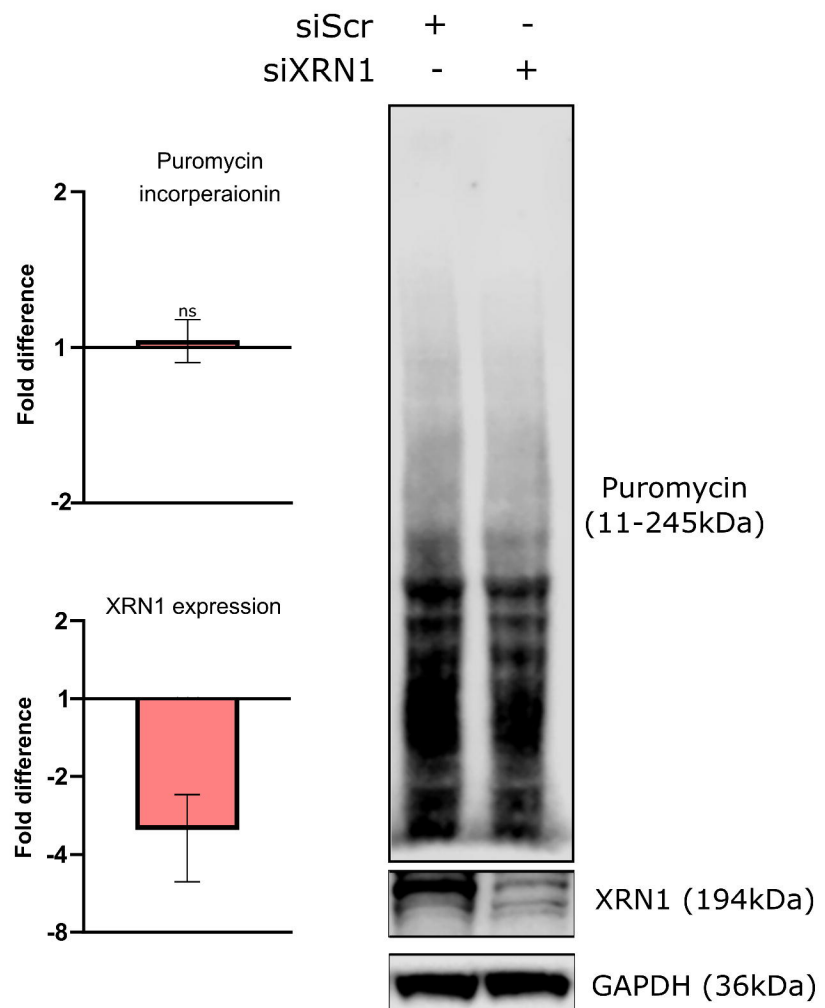

**A**

bioRxiv preprint doi: <https://doi.org/10.1101/2020.08.11.246249>; this version posted August 11, 2020. The copyright holder for this preprint (which was not certified by peer review) is the author/funder, who has granted bioRxiv a license to display the preprint in perpetuity. It is made available under a [CC-BY-NC-ND 4.0 International license](#).

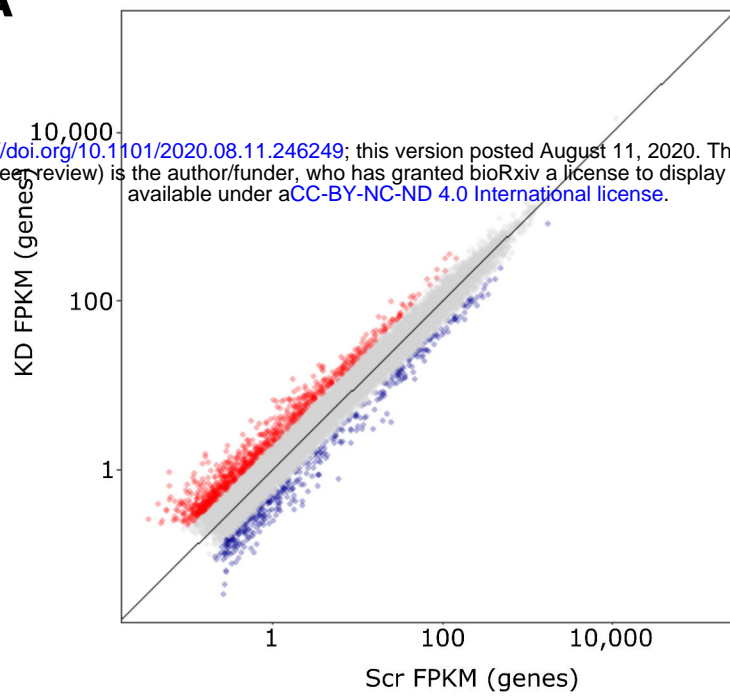**B**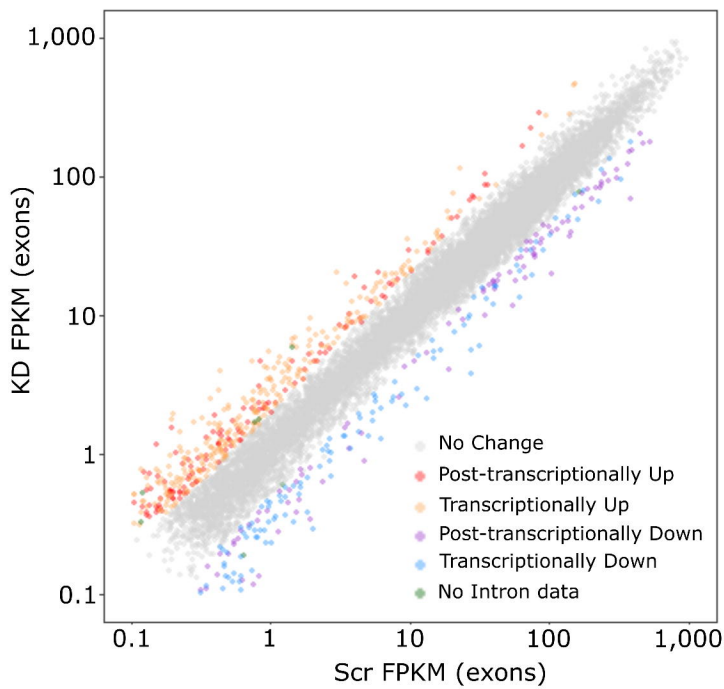**C**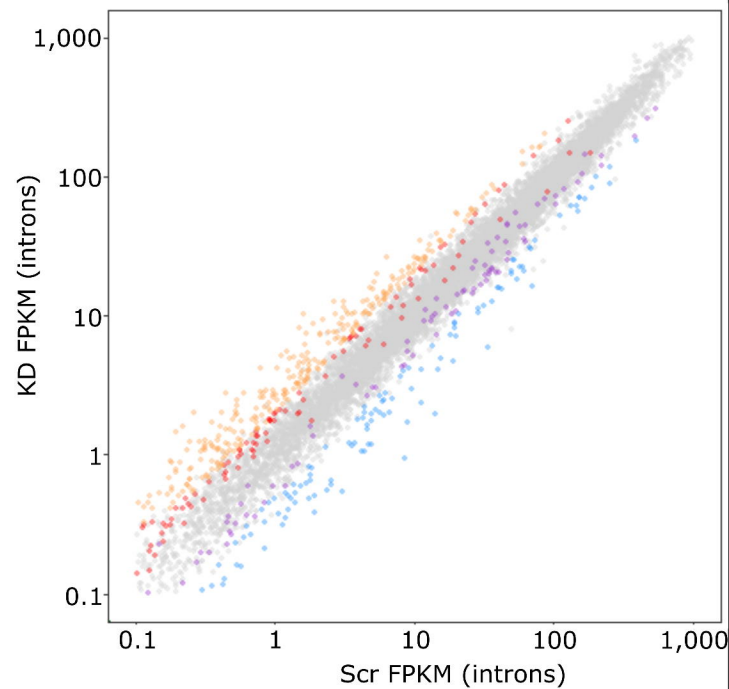**D**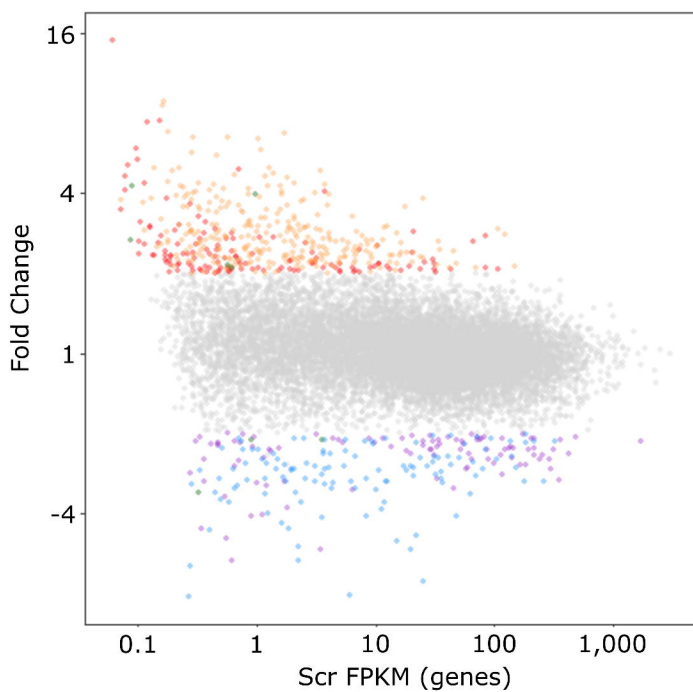**E**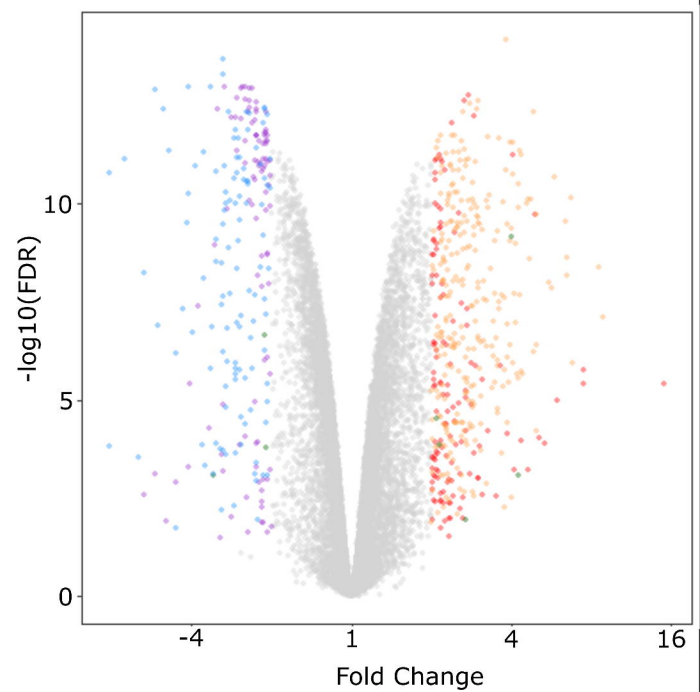

**A**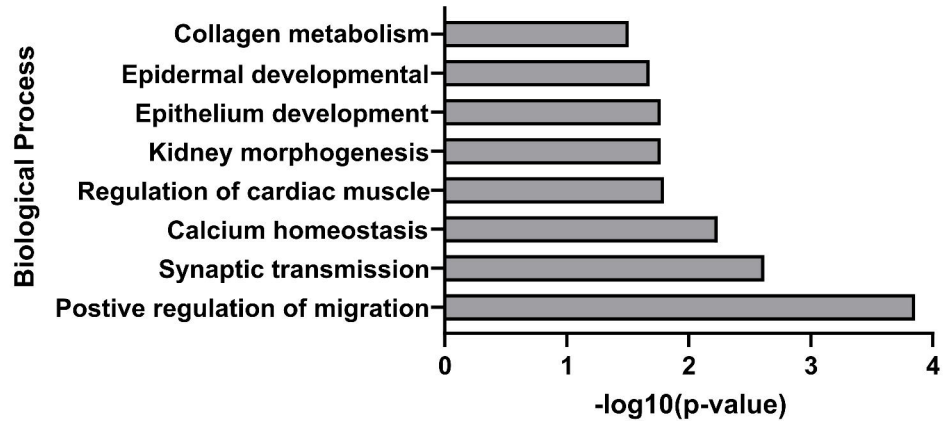**B**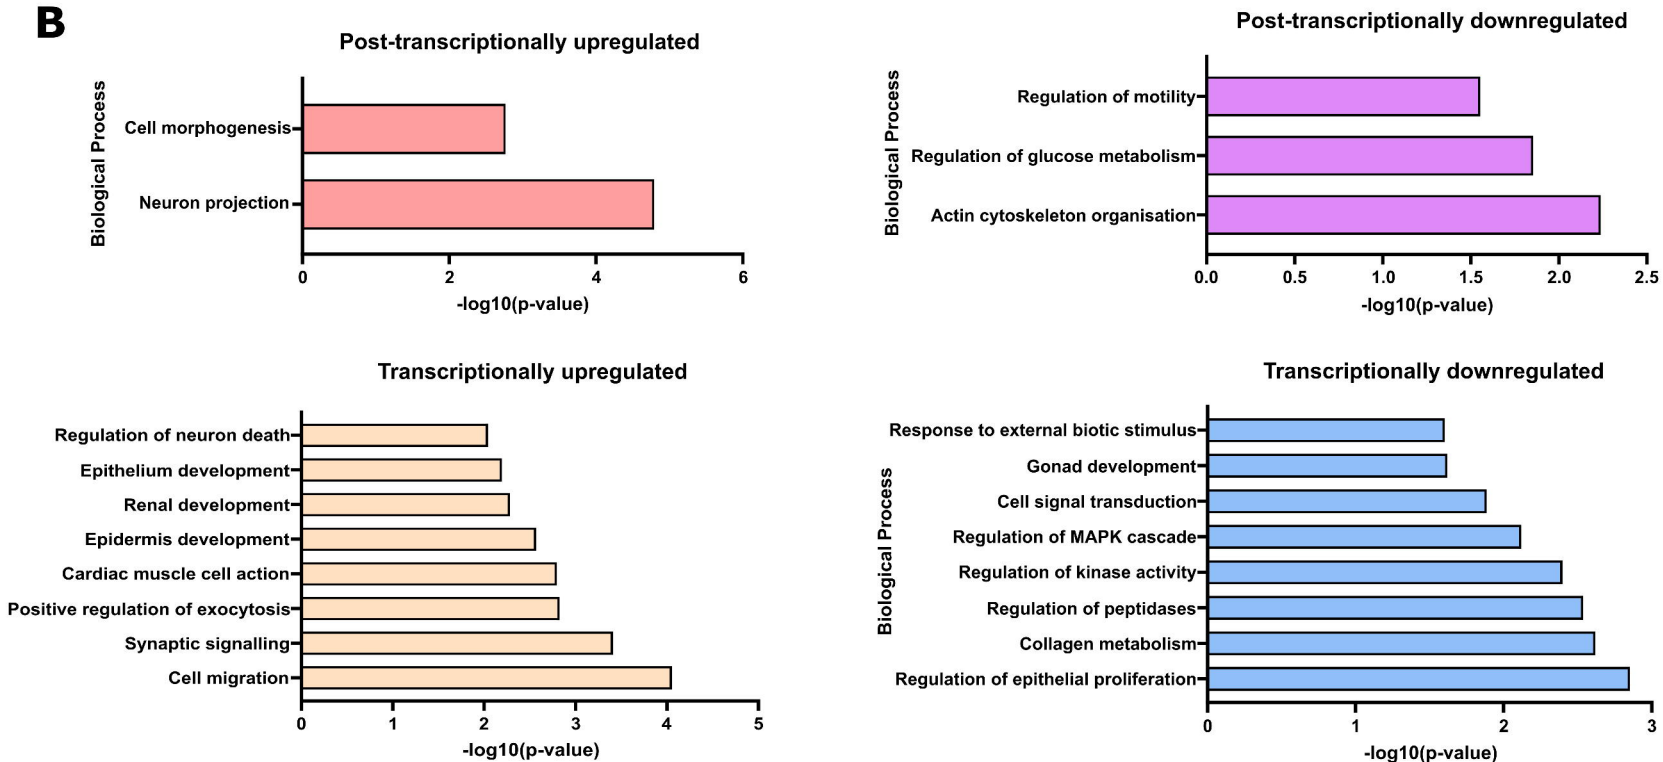

**A**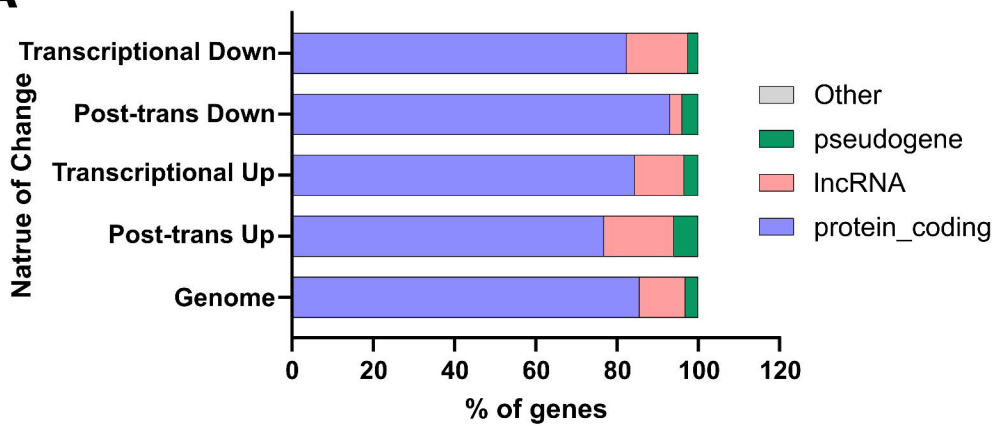**B**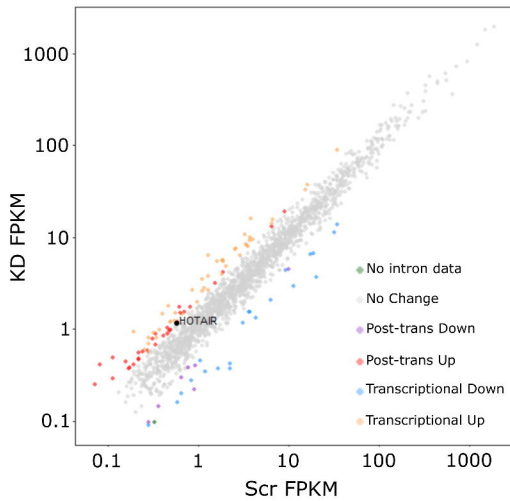**C**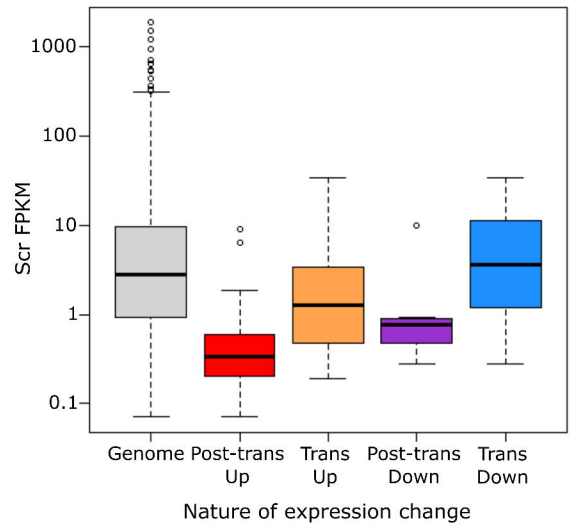**D**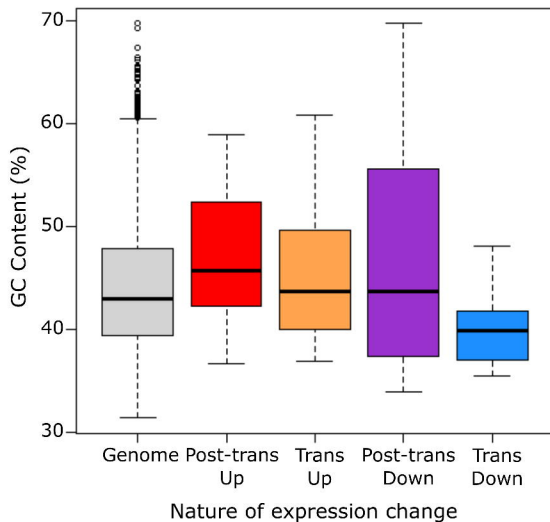**E**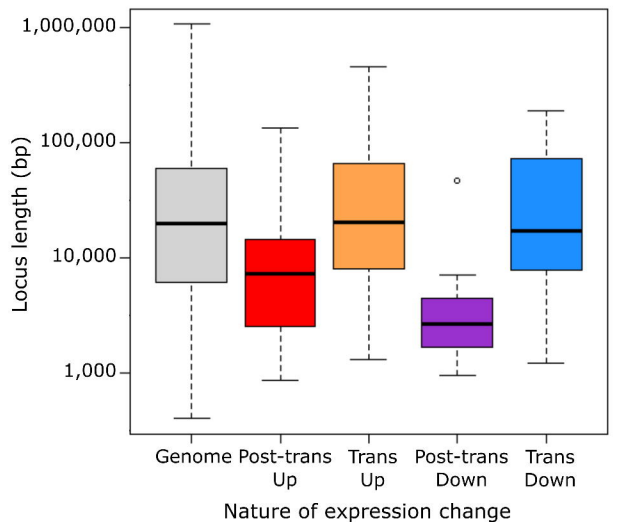

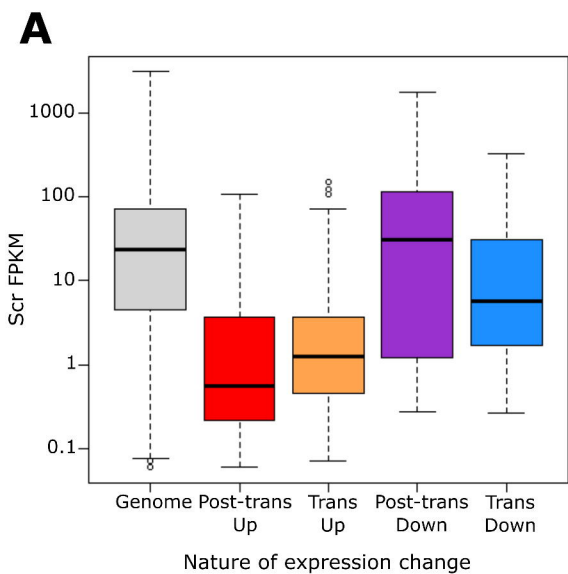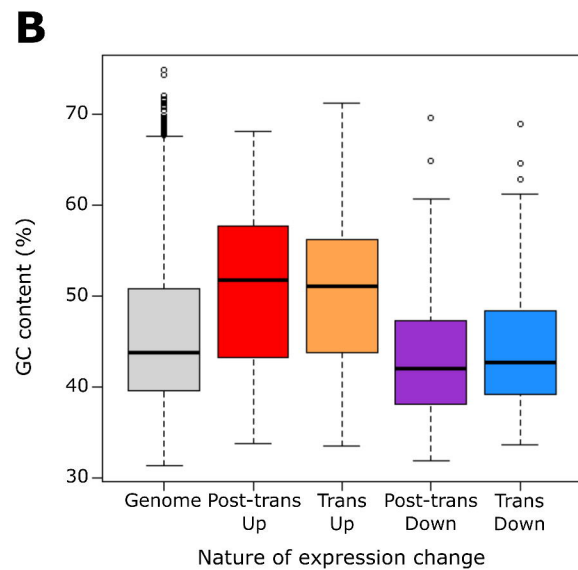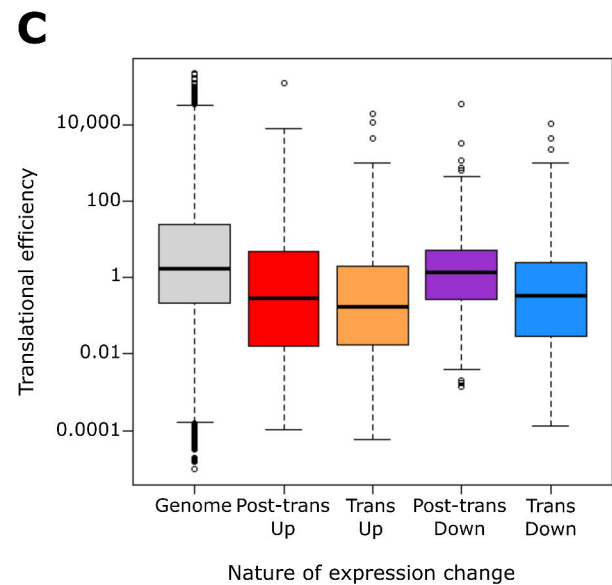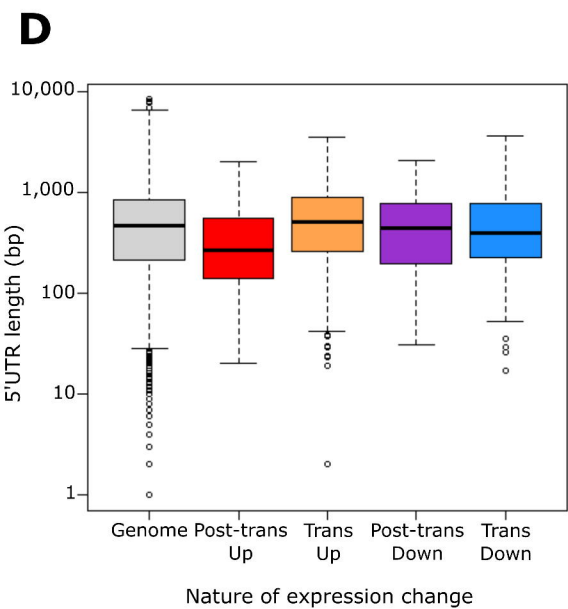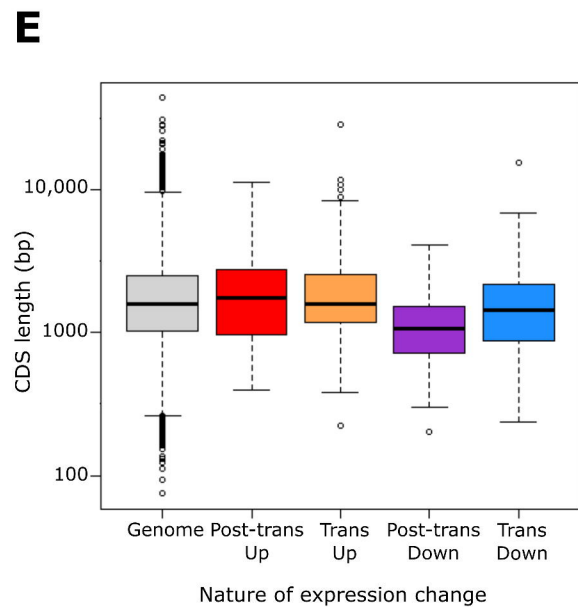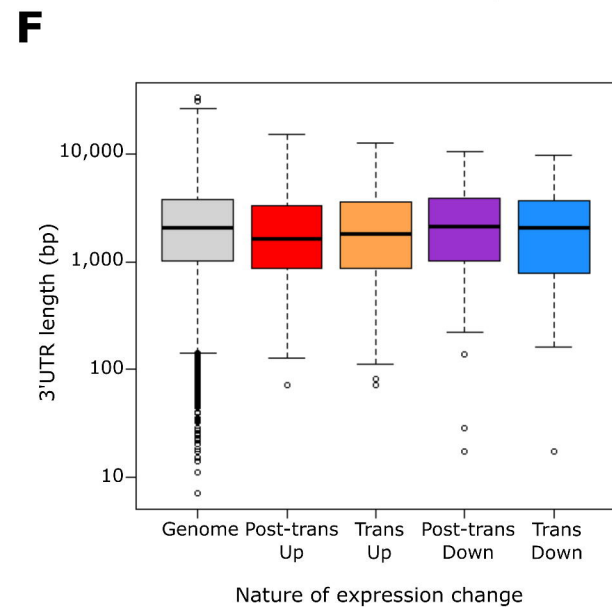

**A**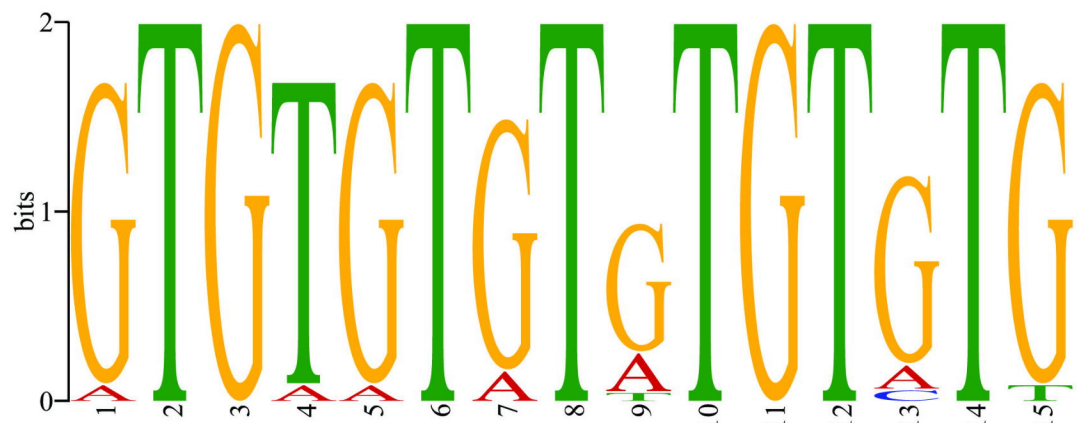**B**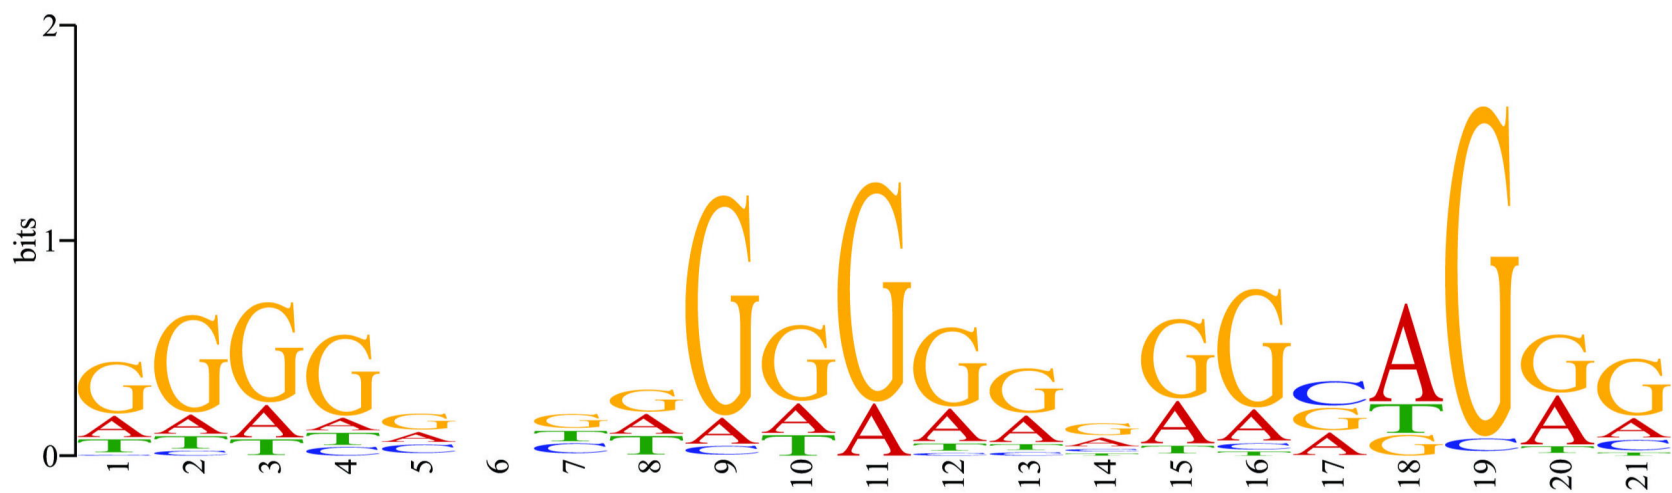**C**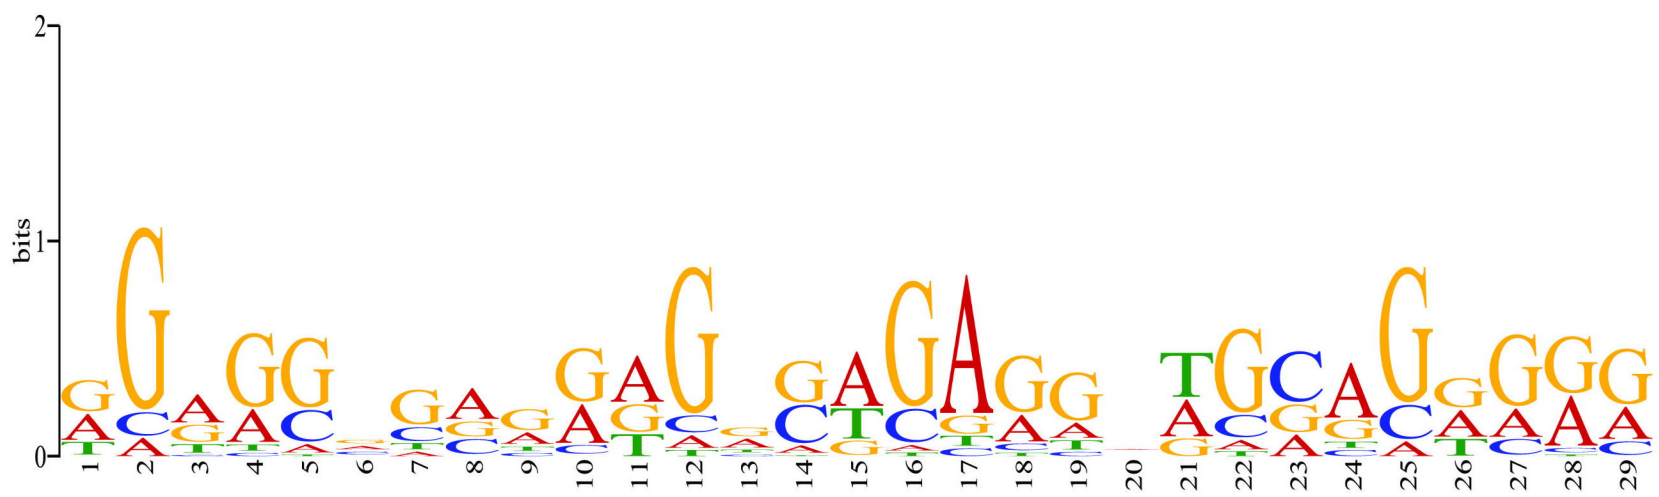

Source: http://biorxiv.org/content/10.1101/2020.08.11.246249v1.full.pdf
